# Supplementary material
Source: publisher figshare collection journal article supplement (https://acs.figshare.com/ndownloader/files/5777337)

## **Synthesis of the C(29)–C(45) Bis-Pyran (E-F) Subunit of Spongistatin 1 (Altohyrtin A)**

Glenn C. Micalizio, Anantoly N. Pinchuk, and William R. Roush\*

*Department of Chemistry, University of Michigan, Ann Arbor, MI 48109*

Email Address: roush@umich.edu

### **SUPPORTING INFORMATION:**

Complete experimental procedures for the synthesis of the C(29)-C(45) Bis-Pyran subunit (E-F) of spongistatin 1 (altohyrtin A) and <sup>1</sup>H NMR spectra of compounds **2, 3, 17, 19, 31, 38, 39, 40, 41, 42, 43, 44, 61, 62, 68, 70, and 71** (46 pages).

**General.** All reactions were conducted in flame dried glassware under nitrogen. All solvents were purified before use. THF and Et<sub>2</sub>O were dried by distillation from sodium benzophenone ketyl. CH<sub>2</sub>Cl<sub>2</sub>, pyridine, DMF were dried by distillation from CaH<sub>2</sub>. Methanol was distilled from magnesium turnings. Toluene was dried by distillation from sodium. All other commercially available reagents and solvents were used as received.

<sup>1</sup>H NMR data were recorded at either 500 MHz or 400 MHz using a Varian I-500 or a Varian XL-400 instrument respectively. <sup>1</sup>H NMR chemical shifts are reported relative to residual CHCl<sub>3</sub> (7.26 ppm). <sup>13</sup>C NMR data were recorded at either 125 MHz or 100 MHz using a Varian I-500 or a Varian XL-400 instrument respectively. <sup>13</sup>C chemical shifts are reported relative to the central line of CDCl<sub>3</sub> (77.0 ppm). Infrared spectra were recorded using a Perkin Elmer Spectrum 1000 FT-IR (thin film). High resolution mass spectroscopy were performed on a VG 70-250-S Micromass, Inc. mass spectrometer at the University of Michigan Mass Spectrometry Laboratory. Optical rotations were measured on either a Rudolph Autopol III polarimeter using a 1 mL capacity quartz cell with a 10 cm path length. Elemental analyses were performed by the Elemental Analysis Laboratory at the University of Michigan.

Chromatographic purifications were performed using Kieselgel 60, 230-400 mesh, silica gel unless indicated otherwise. All compounds purified by chromatography were sufficiently pure for use in further experiments, unless indicated otherwise. Analytical and semi-preparative HPLC normal phase separations were performed using an HPLC system composed of two Rainin HXPL pumps, a Rheodyne 7125 injector, a Dynamax UV-C or RI-1 detector and Dynamax software on a Macintosh II SI to integrate the peaks.

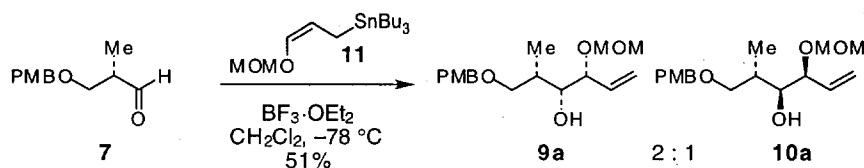

**(2*S*,3*R*,4*R*)-1-(4-methoxy-benzyloxy)-4-methoxy-methoxy-2-methyl-hex-5-en-3-ol (9a).** **Method A:** To a  $-78\text{ }^{\circ}\text{C}$  solution of the aldehyde **7** (34 mmol) in 100 mL of  $\text{CH}_2\text{Cl}_2$  was added the  $\gamma$ -alkoxyallylstannane **11** (14.4 g, 36.7 mmol) followed by  $\text{BF}_3\cdot\text{OEt}_2$  (5.2 mL, 41 mmol). The solution was stirred at  $-78\text{ }^{\circ}\text{C}$  under  $\text{N}_2$  for 4.5 h, after which time, the reaction was quenched with 5 mL of  $\text{NEt}_3$ . The solution was warmed to room temperature, diluted with EtOAc and washed sequentially with  $\text{NaHCO}_3$  (sat),  $\text{KHSO}_4$  (1M),  $\text{NH}_4\text{Cl}$  (sat),  $\text{NaHCO}_3$  (sat), then brine. The organic layer was dried overnight with  $\text{Na}_2\text{SO}_4$ . The crude product was purified by flash column chromatography (hexanes/ethyl acetate) to afford 5.38 g (51%) of a 2 : 1 mixture of diastereomers **9a** and **10a**.

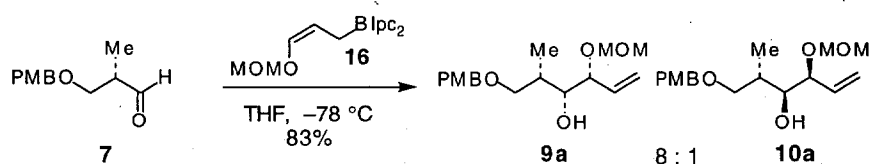

**Method B:** To a  $-78\text{ }^{\circ}\text{C}$  solution of the allyl MOM ether (2.05 g, 20.1 mmol) in 8 mL of THF was added 14.5 mL of *s*-BuLi (1.16 M in cyclohexane; 16.8 mmol). The solution was stirred for 10 min after which time (-)IpcBOMe (5.02 g, 15.9 mmol) in 8 mL of THF was added dropwise via cannula. The solution was stirred at  $-78\text{ }^{\circ}\text{C}$  for 90 min, then  $\text{BF}_3\cdot\text{OEt}_2$  (2.6 mL, 20.5 mmol) was added via syringe, followed by the dropwise addition of aldehyde **7** (16.9 mmol) as a solution in 7 mL of THF. The solution was allowed to stir overnight ( $-78\text{ }^{\circ}\text{C}$  to  $23\text{ }^{\circ}\text{C}$ ), then cooled to  $0\text{ }^{\circ}\text{C}$ , and diluted with 3N NaOH (8 mL) and  $\text{H}_2\text{O}_2$  (3.3 mL, 30% solution). The mixture was stirred for 3 h, then was diluted with EtOAc and washed sequentially with  $\text{NH}_4\text{Cl}$  (sat),  $\text{NaHCO}_3$  (sat), then brine. The organic layer was dried over  $\text{MgSO}_4$ , filtered and concentrated to provide a crude oil which was purified by flash column chromatography [160 g  $\text{SiO}_2$  - 100% hexanes (500 mL), 20 : 1 hexanes : EtOAc (1 L), 15 : 1 hexanes : EtOAc (1 L), 9 : 1 hexanes : EtOAc (1 L), 6 : 1 hexanes : EtOAc (700 mL), 4 : 1 hexanes : EtOAc (500 mL)], which afforded 4.46 g (83% based on **7**) of an 8 : 1 mixture of diastereomers **9a** : **10a** (the mixture was then repurified by HPLC - 35 % EtOAc in hexanes, 21 mm column Dynamax 60A, U.V. detection, 10 ml/min, to obtain analytically pure **10a**).

**Data for (2*S*,3*R*,4*R*)-1-(4-methoxy-benzyloxy)-4-methoxy-methoxy-2-methyl-hex-5-en-3-ol (9a):**  $[\alpha]_{\text{D}}^{26} -61.1^{\circ}$  (*c* 1.4,  $\text{CH}_2\text{Cl}_2$ );  $^1\text{H}$  NMR (500 MHz,  $\text{CDCl}_3$ )  $\delta$  7.28-7.26 (m, 2

H), 6.90-6.87 (m, 2 H), 5.66 (ddd,  $J = 17.4, 8.4, 1.7$  Hz, 1 H), 5.35-5.31 (m, 2 H), 4.76 (A of AB,  $J = 6.6$  Hz, 1 H), 4.61 (B of AB,  $J = 6.6$  Hz, 1 H), 4.47 (A of AB,  $J = 11.6$  Hz, 1 H), 4.44 (B of AB,  $J = 11.6$  Hz, 1 H), 4.01 (dd,  $J = 8.3, 8.3$  Hz, 1 H), 3.82 (s, 3 H), 3.77 (ddd,  $J = 8.1, 5.2, 2.8$  Hz, 1 H), 3.54 (dfd,  $J = 9.0, 6.8$  Hz, 1 H), 3.43-3.40 (m, 4 H), 2.73 (d,  $J = 2.4$  Hz, 1 H), 1.95-1.93 (m, 1 H), 0.94 (d,  $J = 7.1$  Hz, 3 H);  $^{13}\text{C}$  NMR (100 MHz,  $\text{CDCl}_3$ )  $\delta$  159.1, 134.5, 130.6, 129.2, 120.0, 113.7, 94.0, 80.1, 73.51, 73.47, 72.8, 55.7, 55.2, 34.6, 10.0; IR (thin film) 3497, 3076, 2935, 2888, 2857, 2062, 1882, 1613, 1586, 1514, 1465, 1442, 1422, 1403, 1363, 1302, 1248, 1212, 1173, 1142, 1094, 1035  $\text{cm}^{-1}$ ; HRMS (CI,  $\text{NH}_3$ ) calcd for  $\text{C}_{17}\text{H}_{27}\text{O}_5$ , 311.1858  $m/z$  ( $\text{M} + \text{H}^+$ ); observed, 311.1863  $m/z$ . Anal. Calcd for  $\text{C}_{17}\text{H}_{26}\text{O}_5$ : C, 65.78; H, 8.44. Found: C, 65.63; H, 8.40.

**Data for (2S,3S,4S)-1-(4-methoxy-benzyloxy)-4-methoxy-methoxy-2-methyl-hex-5-en-3-ol (10a):** Characterized as a 3 : 1 mixture with an unidentified minor diastereomer;  $^1\text{H}$  NMR (500 MHz,  $\text{CDCl}_3$ )  $\delta$  7.27-7.24 (m, 2 H), 6.89-6.87 (m, 2 H), 5.86 (ddd,  $J = 17.7, 10.5, 7.6$  Hz, 1 H), 5.31-5.26 (m, 2 H), 4.73 (A of AB,  $J = 6.8$  Hz, 1 H), 4.59 (B of AB,  $J = 6.8$  Hz, 1 H), 4.45 (s, 3 H), 4.15 (dd,  $J = 7.6, 4.6$  Hz, 1 H), 3.81 (s, 3 H), 3.58-3.47 (m, 3 H), 3.40 (s, 3 H), 3.27 (d,  $J = 4.2$  Hz, 1 H), 2.15-2.10 (m, 1 H), 1.00 (de,  $J = 6.8$  Hz, 3 H); IR (thin film) 3480, 3076, 2934, 2063, 2004, 1883, 1643, 1614, 1586, 1514, 1464, 1422, 1404, 1362, 1302, 1248, 1212, 1173, 1151, 1094, 1033  $\text{cm}^{-1}$ ; HRMS (CI,  $\text{NH}_3$ ) calcd for  $\text{C}_{17}\text{H}_{27}\text{O}_5$ , 311.1858  $m/z$  ( $\text{M} + \text{H}^+$ ); observed, 311.1854  $m/z$ .

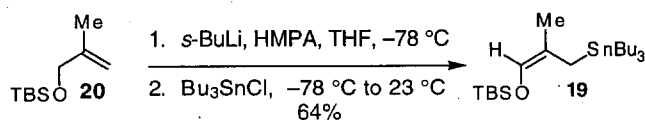

**(Z)- $\gamma$ -(tert-butyldimethylsilyloxy)methallyltributylstannane (19).** To a 78 °C solution of **20** (50g, 268 mmol) in 300 mL of THF was added 240 mL of *s*-BuLi (1.16M in cyclohexane, 280 mmol) via a jacketed addition funnel (over 15 min). Immediately thereafter 50 mL of HMPA was added. The solution was stirred at -78 °C for 15 min, then 74 mL of  $\text{Bu}_3\text{SnCl}$  (270 mmol) was added via syringe. The solution was stirred for 15 min between -70 to -60 °C, then the ice bath was removed. The solution was stirred for 2 h at ambient temperature, then quenched with  $\text{NH}_4\text{Cl}$  (sat), diluted with hexanes and washed with  $\text{NaHCO}_3$  (sat), then  $\text{H}_2\text{O}$ . The organic phase was dried over  $\text{MgSO}_4$  and concentrated to afford a crude oil which was purified by distillation at reduced pressure (ca

0.3 mm Hg; b.p. 160 to 172 °C) providing 81.4 g (64%) of **19**. The distilled product was used as obtained for the allylation of **ent-7**. A small portion of **19** was purified by HPLC (21 mm column Dynamax 60A, 100 % hexanes, 8 ml/min) for characterization purposes: <sup>1</sup>H NMR (500 MHz, CDCl<sub>3</sub>) δ 5.89-5.85 (m, 1 H), 1.77-1.65 (m, 2 H), 1.54-1.44 (m, 9 H), 1.34-1.26 (m, 6 H), 0.93 (s, 9 H), 0.90-0.87 (m, 9 H), 0.85-0.82 (m, 6 H), 0.10 (s, 6 H); <sup>13</sup>C NMR (125 MHz, CDCl<sub>3</sub>) δ 130.0, 116.4, 29.2, 27.4, 25.8, 19.7, 18.2, 13.7, 11.8, 9.6, -5.2; IR (thin film) 2957, 2928, 1667, 1464, 1378, 1362, 1252, 1170, 1087, 1006 cm<sup>-1</sup>; HRMS (CI, NH<sub>3</sub>) calcd for C<sub>18</sub>H<sub>39</sub>OSiSn, 419.1792 *m/z* (M-C<sub>4</sub>H<sub>9</sub>)<sup>+</sup>; observed, 419.1778 *m/z*. Stereochemistry of **19** was confirmed by <sup>1</sup>H nOe's observed between the allylic methyl protons and the olefinic proton.

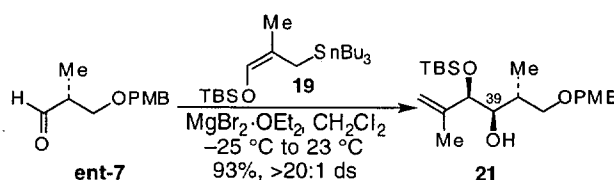

**(2R,3R,4R)-4-(tert-butyldimethylsilyloxy)-1-(4-methoxy-benzyloxy)-2,5-dimethyl-hex-5-en-3-ol (21)**. To a 25 °C solution of aldehyde **ent-7**<sup>1</sup> (14 mmol) in 60 mL of CH<sub>2</sub>Cl<sub>2</sub> was added MgBr<sub>2</sub>·OEt<sub>2</sub> (7.2 g, 28 mmol). The solution was stirred at -25 °C for 30 min, after with time the β-methyl-γ-silyloxyallylstannane **19** (10 g, 21 mmol) was added dropwise as a solution in 60 mL of CH<sub>2</sub>Cl<sub>2</sub>. The solution was allowed to warm to room temperature overnight, then was diluted with 25 mL of CH<sub>3</sub>OH and stirred for 30 min. At this point 25 mL of H<sub>2</sub>O was added and the solution was stirred an additional 30 min. The solution was diluted with EtOAc and washed sequentially with NaHCO<sub>3</sub> (sat) followed by brine. The organic layer was dried over MgSO<sub>4</sub>, and the solution was filtered and concentrated to provide the crude product **21** as >20 : 1 mixture of diastereomers. Crude **21** was purified by flash column chromatography [200 g SiO<sub>2</sub> - 100% hexanes (500 mL), 30 : 1 hexanes : EtOAc (600 mL), 20 : 1 hexanes : EtOAc (600 mL), 15 : 1 hexanes : EtOAc (600 mL)], which afforded 5.14 g (93%) analytically pure **21**: [α]<sub>365</sub><sup>25</sup> +3.6° (c 2.2, CH<sub>2</sub>Cl<sub>2</sub>); <sup>1</sup>H NMR (500 MHz, CDCl<sub>3</sub>) δ 7.27-7.24 (m, 2 H), 6.89-6.86 (m, 2 H), 4.93 (m, 1 H), 4.89 (m, 1 H), 4.43 (s, 2 H), 4.15, (d, *J* = 5.4 Hz, 1 H), 3.80 (s, 3 H), 3.62 (dd, *J* = 9.0, 5.1 Hz, 1 H), 3.41 (dd, *J* = 9.0, 6.5 Hz, 1 H), 3.38 (m, 1 H), 2.64 (d, *J* = 4.9 Hz, 1 H), 1.93-1.86 (m, 1 H), 1.71 (s, 3 H), 1.03 (d, *J* = 6.8 Hz, 3 H), 0.91 (s, 9 H),

0.07 (s, 3 H), 0.03 (s, 3 H);  $^{13}\text{C}$  NMR (100 MHz,  $\text{CDCl}_3$ )  $\delta$  159.0, 145.3, 130.8, 129.2, 113.7, 113.6, 77.1, 75.6, 72.8, 71.9, 55.2, 35.3, 25.8, 18.2, 18.0, 15.4, -4.5, -5.1; IR (thin film) 3563, 3073, 2956, 2930, 2858, 1613, 1514, 1249, 1093, 1040  $\text{cm}^{-1}$ ; HRMS (CI,  $\text{NH}_3$ ) calcd for  $\text{C}_{22}\text{H}_{39}\text{SiO}_4$ , 395.2618  $m/z$  ( $\text{M} + \text{H}$ ) $^+$ ; observed, 395.2619  $m/z$ . Anal. Calcd for  $\text{C}_{22}\text{H}_{38}\text{SiO}_4$ : C, 66.96; H, 9.71. Found: C, 67.00; H, 9.84.

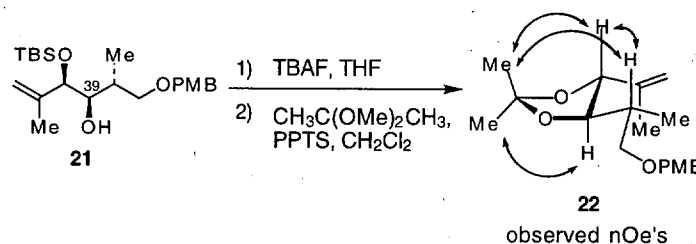

**(2R,3R,4R)-3,4-O-isopropyliden-1-(4-methoxy-benzyloxy)-2,5-dimethyl-hex-5-en (22).** To a solution of **21** (240 mg, 0.6mmol) in 2 mL of THF was added TBAF (0.6 mL of a 1.0M solution in THF). The solution was stirred for 2 h, then diluted with EtOAc and washed sequentially with  $\text{NaHCO}_3$  (sat) and brine. The organic layer was dried over  $\text{MgSO}_4$ , concentrated and purified by flash column chromatography [15 g  $\text{SiO}_2$  - 100% hexanes (200 mL), 1 : 1 hexanes : EtOAc (400 mL)]. The purified diol was diluted with 2 mL of  $\text{CH}_2\text{Cl}_2$  and 2,2-dimethoxypropane (370  $\mu\text{L}$ , 3 mmol) was added along with a catalytic amount of PPTS. The solution was stirred overnight, then was diluted with EtOAc and washed with  $\text{NaHCO}_3$  then brine and dried over  $\text{MgSO}_4$ , affording **22** as an analytically pure oil:  $[\alpha]_{\text{D}}^{25} -1.7^\circ$  ( $c$  1.7,  $\text{CH}_2\text{Cl}_2$ );  $^1\text{H}$  NMR (500 MHz,  $\text{CDCl}_3$ )  $\delta$  7.27-7.24 (m, 2 H), 6.89-6.86 (m, 2 H), 5.08 (s, 1 H), 4.97 (m, 1 H), 4.44 (A of AB,  $J = 11.6$  Hz, 1 H), 4.40 (B of AB,  $J = 11.6$  Hz, 1 H), 4.31 (d,  $J = 8.3$  Hz, 1 H), 3.83-3.80 (m, 1 H), 3.80 (s, 3 H), 3.58 (dd,  $J = 9.3, 5.6$  Hz, 1 H), 3.34 (dd,  $J = 9.1, 6.7$  Hz, 1 H), 2.08-2.03 (m, 1 H), 1.78 (s, 3 H), 1.41 (s, 3 H), 1.39 (s, 3 H), 0.98 (d,  $J = 7.1$  Hz, 3 H);  $^{13}\text{C}$  NMR (100 MHz,  $\text{CDCl}_3$ )  $\delta$  159.1, 142.4, 130.7, 129.1, 115.6, 113.7, 108.1, 83.1, 79.6, 72.7, 71.9, 55.3, 36.3, 27.2, 27.0, 17.1, 13.9; IR (thin film) 3077, 2985, 2934, 2860, 1651, 1613, 1587, 1514, 1248, 1173  $\text{cm}^{-1}$ ; HRMS (EI) calcd for  $\text{C}_{19}\text{H}_{28}\text{O}_4$ , 320.1988  $m/z$  ( $\text{M}^+$ ); observed, 320.1999  $m/z$ . Anal. Calcd for  $\text{C}_{19}\text{H}_{28}\text{O}_4$ : C, 71.22; H, 8.81. Found: C, 70.88; H, 8.91. The stereochemistry of **22** was confirmed by the  $^1\text{H}$  nOe's summarized above.

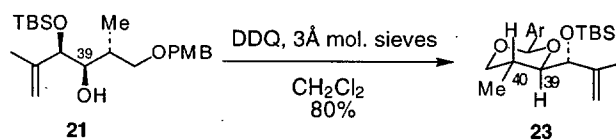

**(2R,3R,4R)-1,3-O-(4-methoxy-benzylidene)-4-(tert-butyldimethylsilanyloxy)-2,5-dimethyl-hex-5-en (23).** A solution of **21** (1.81 g, 4.59 mmol) in 25 mL of CH<sub>2</sub>Cl<sub>2</sub> with 1 g of freshly activated 3 Å mol sieves was stirred for 10 min, after which time DDQ (1.09 g, 4.80 mmol) was added in a single portion.<sup>2</sup> The reaction mixture was stirred for 3.5 h, then diluted with EtOAc and washed sequentially with NaHCO<sub>3</sub> (sat) and brine. The organic layer was dried overnight over Na<sub>2</sub>SO<sub>4</sub>, then filtered and concentrated to afford an oil which was purified by flash column chromatography [80 g SiO<sub>2</sub> - 100% hexanes (250 mL), 50 : 1 hexanes : EtOAc (200 mL), 40 : 1 hexanes : EtOAc (200 mL), 20 : 1 hexanes : EtOAc (200 mL)] providing 1.44 g **23** (79%): [ $\alpha$ ]<sub>D</sub><sup>25</sup> -7.0° (c 1.2, CH<sub>2</sub>Cl<sub>2</sub>); <sup>1</sup>H NMR (500 MHz, CDCl<sub>3</sub>)  $\delta$  7.42-7.39 (m, 2 H), 6.90-6.87 (m, 2 H), 5.37 (s, 1 H), 5.09 (m, 1 H), 4.94 (m, 1 H), 4.24 (d, *J* = 2.4 Hz, 1 H), 4.03 (dd, *J* = 11.2, 4.9 Hz, 1 H), 3.80 (s, 3 H), 3.49 (dd, *J* = 10.0, 2.9, Hz, 1 H), 3.47 (dd, *J* = 11.23, 4.9 Hz, 1 H), 2.05-2.00 (m, 1 H), 1.85 (s, 3 H), 0.92 (s, 9 H), 0.83 (d*J* = 6.6 Hz, 3 H), 0.06 (s, 3 H), 0.03 (s, 3 H); <sup>13</sup>C NMR (75 MHz, CDCl<sub>3</sub>)  $\delta$  159.7, 145.2, 131.3, 127.4, 113.5, 111.9, 101.4, 86.1, 76.9, 73.1, 55.3, 30.1, 25.9, 20.4, 18.3, 12.8, -4.8, -5.1; IR (thin film) 3072, 2955, 2930, 2857, 1722, 1651, 1615, 1590, 1520, 1250 cm<sup>-1</sup>; HRMS (CI, NH<sub>3</sub>) calcd for C<sub>22</sub>H<sub>37</sub>SiO<sub>4</sub>, 393.2461 *m/z* (M + H)<sup>+</sup>; observed, 393.2450 *m/z*. Anal. Calcd for C<sub>22</sub>H<sub>36</sub>SiO<sub>4</sub>: C, 67.30; H, 9.24. Found: C, 67.07; H, 9.29. The C(39-40) stereochemistry was assigned on the basis of the following coupling constant, *J*<sub>39, 40</sub> = 10 Hz.

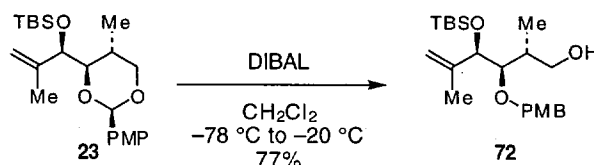

**(2R,3R,4R)-4-(tert-butyldimethylsilanyloxy)-3-(4-methoxy-benzylidene)-2,5-dimethyl-hex-5-en-1-ol (72).** To a -78 °C solution of the PMP acetal **23** (1.43 g, 3.64 mmol) in 20 mL of CH<sub>2</sub>Cl<sub>2</sub> was added 11 mL of DIBAL (1.0 M in CH<sub>2</sub>Cl<sub>2</sub>, 11 mmol). The solution was warmed to -20 °C over 4 h, after which time 10 mL of a saturated solution of Rochelle's salt was added. After the aluminum salts went into solution, EtOAc was added, and the solution was washed with

NaHCO<sub>3</sub> (sat) and brine. The organic layer was dried over MgSO<sub>4</sub>, filtered and concentrated to provide the crude product which was purified by flash column chromatography (hexanes/EtOAc). In this way 1.11 g of the primary carbinol **72** (77%) was obtained:  $[\alpha]_D^{25} +25.2^\circ$  (*c* 1.0, CH<sub>2</sub>Cl<sub>2</sub>); <sup>1</sup>H NMR (500 MHz, CDCl<sub>3</sub>)  $\delta$  7.28-7.23 (m, 2 H), 6.89-6.86 (m, 2 H), 4.97 (s, 1 H), 4.89 (s, 1 H), 4.85 (A of AB, *J* = 10.8 Hz, 1 H), 4.47 (B of AB, *J* = 10.8 Hz, 1 H), 4.31 (d, *J* = 7.1 Hz, 1 H), 3.80-3.75 (m, 1 H), 3.80 (s, 3 H), 3.47 (ddd, *J* = 11.7, 7.1, 5.1 Hz, 1 H), 3.41 (dd, *J* = 7.1, 3.9 Hz, 1 H), 2.93 (dd, *J* = 7.1, 4.4 Hz, 1 H), 1.78-1.70 (m, 4 H), 0.99 (d, *J* = 7.3 Hz, 3 H), 0.91 (s, 9 H), 0.09 (s, 3 H), 0.05 (s, 3 H); <sup>13</sup>C NMR (100 MHz, CDCl<sub>3</sub>)  $\delta$  159.2, 145.1, 130.5, 129.4, 113.8, 87.1, 79.0, 75.2, 65.4, 55.24, 55.21, 35.3, 25.9, 18.2, 18.0, 15.8, -4.7, -4.8; IR (thin film) 3446, 3074, 2954, 2064, 1879, 1809, 1652, 1646, 1615, 1587, 1516, 1506, 1302, 1249, 1174, 1039 cm<sup>-1</sup>; HRMS (CI, NH<sub>3</sub>) calcd for C<sub>22</sub>H<sub>39</sub>SiO<sub>4</sub>, 395.2618 *m/z* (*M* + H)<sup>+</sup>; observed, 395.2615 *m/z*. Anal. Calcd for C<sub>22</sub>H<sub>38</sub>SiO<sub>4</sub>: C, 66.96; H, 9.71. Found: C, 66.81; H, 9.85.

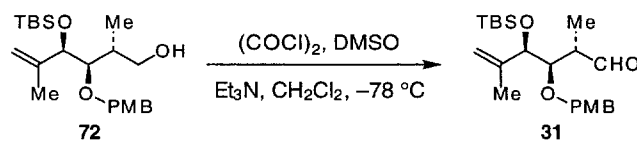

**(2*S*,3*R*,4*R*)-4-(*tert*-butyldimethylsilanyloxy)-3-(4-methoxy-benzyloxy)-2,5-dimethyl-5-hexenal (31).** To a -78 °C solution of DMSO (58  $\mu$ L, 0.82 mmol) in 1 mL of CH<sub>2</sub>Cl<sub>2</sub> was added (COCl)<sub>2</sub> (54  $\mu$ L, 0.62 mmol). The solution was stirred at -78 °C for 5 min, after which time a solution of the primary alcohol **72** (0.41 mmol) was added dropwise as a solution in 1.5 mL of CH<sub>2</sub>Cl<sub>2</sub>. The solution was stirred at -78 °C for 15 min, then Et<sub>3</sub>N was added (230  $\mu$ L, 1.65 mmol) and the solution was warmed to ambient temperature. The solution was then diluted with EtOAc, and washed sequentially with KHSO<sub>4</sub> (1M), NaHCO<sub>3</sub> (sat), then brine. The organic layer was dried over MgSO<sub>4</sub>, filtered and concentrated to afford the crude aldehyde **31** which was used in subsequent experiments without purification: <sup>1</sup>H NMR (500 MHz, CDCl<sub>3</sub>)  $\delta$  9.70 (m, 1 H), 7.23 (m, 2 H), 6.87 (m, 2 H), 5.03 (d, *J* = 1.0 Hz, 1 H), 4.95 (s, 1 H), 4.76 (A of AB, *J* = 11.1 Hz, 1 H), 4.49 (B of AB, *J* = 11.1 Hz, 1 H), 4.35 (d, *J* = 6.3 Hz, 1 H), 3.80 (s, 3 H), 3.56 (dd, *J* = 6.6, 3.9 Hz, 1 H), 2.58-2.52 (m, 1 H), 1.77 (s, 3 H), 1.07 (d, *J* = 7.1 Hz, 3 H), 0.91 (s, 9 H), 0.06 (s, 3 H), 0.03 (s, 3 H); IR (thin film) 3074, 2955, 2931, 2886, 2857, 2063, 21006, 1924, 1880, 1728, 1648, 1614, 1587, 1515,



1471, 1464, 1390, 1374, 1361, 1302, 1250, 1174, 1090  $\text{cm}^{-1}$ ; HRMS (CI,  $\text{NH}_3$ ) calcd for  $\text{C}_{22}\text{H}_{37}\text{SiO}_4$ , 393.2461  $m/z$  ( $\text{M} + \text{H}^+$ ); observed, 393.2454  $m/z$ .

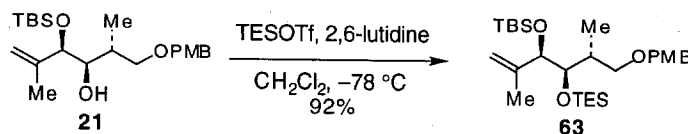

**(2R,3R,4R)-4-(tert-butyldimethylsilyloxy)-1-(4-methoxy-benzyloxy)-2,5-dimethyl-3-triethylsilyloxy-hex-5-en (63).** To a  $-78\text{ }^\circ\text{C}$  solution of **21** (1.02 g, 2.58 mmol) in 15 mL of  $\text{CH}_2\text{Cl}_2$  added 2,6-lutidine (450  $\mu\text{L}$ , 3.9 mmol) followed by TESOTf (750  $\mu\text{L}$ , 3.3 mmol). The mixture was allowed to warm to  $-50\text{ }^\circ\text{C}$  over 50 min. The reaction was quenched by the addition of 5 mL of  $\text{NaHCO}_3$  (sat) and the solution was warmed to room temperature. The mixture was diluted with EtOAc and washed sequentially with  $\text{KHSO}_4$  (1M),  $\text{NaHCO}_3$  (sat), then brine. The organic layer was dried over  $\text{MgSO}_4$ , filtered and concentrated to afford a crude oil which was purified by flash column chromatography [80 g  $\text{SiO}_2$  - 100% hexanes (200 mL), 40 : 1 hexanes - EtOAc (400 mL), 20 : 1 hexanes - EtOAc (400 mL)] and provided 1.22 g (92%) of the silyl ether **63** as an analytically pure oil:  $[\alpha]_{\text{D}}^{25} +25.1^\circ$  ( $c$  2.0,  $\text{CH}_2\text{Cl}_2$ );  $^1\text{H}$  NMR (500 MHz,  $\text{CDCl}_3$ )  $\delta$  7.26-7.24 (m, 2 H), 6.87-6.86 (m, 2 H), 5.02 (s, 1 H), 4.85 (s, 1 H), 4.41 (s, 2 H), 4.06 (d,  $J = 5.1$  Hz, 1 H), 3.80 (s, 3 H), 3.59 (dd,  $J = 4.9$ , 4.9 Hz, 1 H), 3.55 (dd,  $J = 9.1$ , 4.0 Hz, 1 H), 3.22 (dd,  $J = 8.8$ , 8.8 Hz, 1 H), 2.00-1.95 (m, 1 H), 1.74 (s, 3 H), 1.02 (d,  $J = 6.8$  Hz, 3 H), 0.95 (t,  $J = 8.1$  Hz, 9 H), 0.90 (s, 9 H), 0.61 (q,  $J = 7.8$  Hz, 6 H), 0.04 (s, 3 H), 0.00 (s, 3 H);  $^{13}\text{C}$  NMR (100 MHz,  $\text{CDCl}_3$ )  $\delta$  159.0, 145.2, 131.1, 129.1, 113.6, 112.7, 78.5, 78.1, 72.5, 72.4, 55.3, 35.4, 26.0, 20.1, 18.2, 16.2, 7.1, 5.2,  $-4.7$ ,  $-4.8$ ; IR (thin film) 3096, 2955, 2878, 2858, 1648, 1614, 1587, 1514, 1464, 1249  $\text{cm}^{-1}$ ; HRMS (CI,  $\text{NH}_3$ ) calcd for  $\text{C}_{28}\text{H}_{56}\text{Si}_2\text{NO}_4$ , 526.3748  $m/z$  ( $\text{M} + \text{NH}_4^+$ ); observed, 526.3761  $m/z$ . Anal. Calcd for  $\text{C}_{28}\text{H}_{52}\text{Si}_2\text{O}_4$ : C, 66.09; H, 10.30. Found: C, 66.02; H, 10.27.

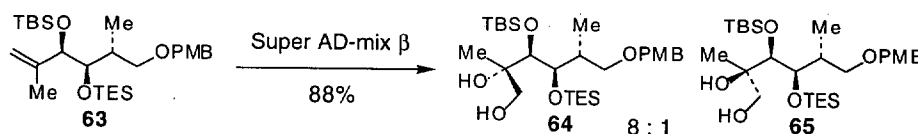

**(2S,3S,4R,5R)-3-(tert-butyldimethylsilyloxy)-6-(4-methoxy-benzyloxy)-2,5-dimethyl-4-triethylsilyloxy-hexane-1,2-diol (64).** To a solution of **63** (5.34 g, 10.5 mmol) in 50 mL of *t*-BuOH was added (DHQD)<sub>2</sub>-Phal (402 mg, 0.52 mmol) followed by methanesulfonamide (10.4 mmol), K<sub>2</sub>CO<sub>3</sub> (4.4 g, 31.8 mmol), and K<sub>3</sub>Fe(CN)<sub>6</sub> (10.4 g, 31.6 mmol).<sup>3</sup> The solution was diluted with 50 mL of H<sub>2</sub>O and K<sub>2</sub>OsO<sub>4</sub>·2H<sub>2</sub>O (46 mg, 0.12 mmol) was added in a single portion. The mixture was stirred vigorously at 0 °C for 21 h, after which time the reaction was quenched by the addition of solid sodium sulfite (10g). The solution was stirred at room temperature for 45 min, then diluted with EtOAc and washed sequentially with NaHCO<sub>3</sub> (sat) and brine. The organic layer was dried over MgSO<sub>4</sub>, filtered and concentrated to afford a crude oil (8 : 1 d.s. by <sup>1</sup>H NMR analysis) which was purified by flash column chromatography [400 g SiO<sub>2</sub> - 100% hexanes (500 mL), 18 : 1 hexanes - EtOAc (1 L)] providing 4.12 g pure **64** (72%) along with 898 mg of a mixture of **64** and **65** (16%). Data for **64**: [α]<sub>D</sub><sup>25</sup> +19.5° (*c* 1.0, CH<sub>2</sub>Cl<sub>2</sub>); <sup>1</sup>H NMR (500 MHz, CDCl<sub>3</sub>) δ 7.26-7.24 (m, 2 H), 6.88-6.86 (m, 2 H), 4.45-4.39 (m, 3 H), 3.92 (d, *J* = 4.2 Hz, 1 H), 3.80-3.78 (m, 4 H), 3.58 (dd, *J* = 8.8, 3.2 Hz, 1 H), 3.46 (dd, *J* = 11.4, 8.9 Hz, 1 H), 3.32 (dd, *J* = 8.5, 7.6 Hz, 1 H), 3.27 (dd, *J* = 11.4, 5.0 Hz, 1 H), 2.47-2.42 (m, 2 H), 1.19 (s, 3 H), 1.15 (d, *J* = 6.6 Hz, 3 H), 0.96 (t, *J* = 8.1 Hz, 9 H), 0.90 (s, 9 H), 0.63 (q, *J* = 7.8 Hz, 6 H), 0.11 (s, 6 H); <sup>13</sup>C NMR (100 MHz, CDCl<sub>3</sub>) δ 159.0, 130.8, 129.1, 113.6, 78.5, 76.5, 74.0, 72.72, 72.69, 68.5, 55.2, 35.9, 25.9, 21.8, 18.0, 16.7, 6.9, 4.9, -3.2, -5.4; IR (thin film) 3446, 2955, 2067, 1879, 1742, 1614, 1587, 1514, 1248 cm<sup>-1</sup>; HRMS (CI, NH<sub>3</sub>) calcd for C<sub>28</sub>H<sub>55</sub>Si<sub>2</sub>O<sub>6</sub>, 543.3537 *m/z* (M + H)<sup>+</sup>; observed, 543.3539 *m/z*. Anal. Calcd for C<sub>28</sub>H<sub>54</sub>Si<sub>2</sub>O<sub>6</sub>: C, 61.95; H, 10.03. Found: C, 61.97; H, 10.09.

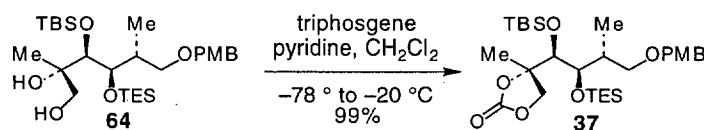

**4-[(1S,2R,3R)-1-(tert-butyldimethylsilyloxy)-4-(4-methoxy-benzyloxy)-3-methyl-2-triethylsilyloxy-butyl]-4-methyl-[1,3]-dioxolan-2-one (37).** To a 78 °C solution of the diol **64** (4.12 g, 7.6 mmol) in 40 mL of CH<sub>2</sub>Cl<sub>2</sub> was added pyridine (2.5 mL, 30.9 mmol), followed by triphosgene (1.8 g, 6.1 mmol) as a solution in 15 mL of CH<sub>2</sub>Cl<sub>2</sub>. The solution was warmed from -78 °C to 0 °C over 1.5 h. The reaction mixture was diluted with NaHCO<sub>3</sub> (sat), warmed

to room temperature and diluted with EtOAc. The solution was washed with NaHCO<sub>3</sub> (sat) and brine. The organic layer was dried over Na<sub>2</sub>SO<sub>4</sub>, filtered and concentrated to provide a crude oil which was purified by flash column chromatography [160 g SiO<sub>2</sub> - 100% hexanes (500 mL), 12 : 1 hexanes - EtOAc (1 L), 9 : 1 hexanes - EtOAc (500 mL)] providing 4.30 g of **37** (99%): [ $\alpha$ ]<sub>D</sub><sup>25</sup> +26.8° (c 2.1, CH<sub>2</sub>Cl<sub>2</sub>); <sup>1</sup>H NMR (500 MHz, CDCl<sub>3</sub>)  $\delta$  7.26-7.22 (m, 2 H), 6.89-6.87 (m, 2 H), 4.64 (d, *J* = 8.1 Hz, 1 H), 4.45 (A of AB, *J* = 11.5 Hz, 1 H), 4.34 (B of AB, *J* = 11.5 Hz, 1 H), 3.90 (d, *J* = 3.7 Hz, 1 H), 3.87 (d, *J* = 8.1 Hz, 1 H), 3.81 (s, 3 H), 3.67 (dd, *J* = 7.1, 3.7 Hz, 1 H), 3.43 (dd, *J* = 8.9, 4.3 Hz, 1 H), 3.17 (dd, *J* = 8.2, 8.2 Hz, 1 H), 1.80-1.75 (m, 1 H), 1.50 (s, 3 H), 1.08 (d, *J* = 6.6 Hz, 3 H), 0.95 (t, *J* = 8.1 Hz, 9 H), 0.89 (s, 9 H), 0.60 (q, *J* = 7.9 Hz, 6 H), 0.12 (s, 3 H), 0.11 (s, 3 H); <sup>13</sup>C NMR (100 MHz, CDCl<sub>3</sub>)  $\delta$  159.3, 154.3, 130.2, 129.5, 113.8, 87.0, 77.6, 77.2, 76.4, 72.3, 72.0, 70.4, 55.3, 35.6, 25.8, 23.7, 18.0, 17.0, 7.0, 5.1, -4.0, -4.9; IR (thin film) 2955, 2062, 2010, 1956, 1808, 1614, 1514 cm<sup>-1</sup>; HRMS (CI, NH<sub>3</sub>) calcd for C<sub>29</sub>H<sub>56</sub>Si<sub>2</sub>NO<sub>7</sub>, 586.3595 *m/z* (M + NH<sub>4</sub>)<sup>+</sup>; observed, 586.3615 *m/z*. Anal. Calcd for C<sub>29</sub>H<sub>52</sub>Si<sub>2</sub>O<sub>7</sub>: C, 61.23; H, 9.21. Found: C, 60.96; H, 9.29.

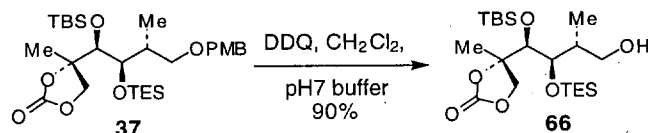

**4-[(1*S*,2*R*,3*R*)-1-(*tert*-butyldimethylsilanyloxy)-4-hydroxy-3-methyl-2-triethylsilanyloxy-butyl]-4-methyl-[1,3]dioxolan-2-one (66).** To a solution of **37** (620 mg, 1.1 mmol) in 8 mL of CH<sub>2</sub>Cl<sub>2</sub> and 2 mL pH 7 buffer was added DDQ (275 mg, 1.2 mmol).<sup>2</sup> The solution was stirred for 1 h, then diluted with EtOAc and washed with NaHCO<sub>3</sub> (sat) (3 x 100 ml), then brine. The organic layer was dried over MgSO<sub>4</sub>, filtered and concentrated to provide a crude oil which was purified by flash column chromatography [40 g SiO<sub>2</sub> - 100% hexanes (500 mL), 9 : 1 hexanes - EtOAc (500 mL), 4 : 1 hexanes - EtOAc (500 mL), providing 444 mg of the primary carbinol **66** (90%): [ $\alpha$ ]<sub>D</sub><sup>25</sup> +28.0° (c 1.5, CH<sub>2</sub>Cl<sub>2</sub>); <sup>1</sup>H NMR (500 MHz, CDCl<sub>3</sub>)  $\delta$  4.68 (A of AB, *J* = 7.8 Hz, 1 H), 4.09 (B of AB, *J* = 7.8 Hz, 1 H), 3.95 (d, *J* = 3.4 Hz, 1 H), 3.71 (dd, *J* = 8.8, 3.4 Hz, 1 H), 3.62-3.58 (m, 1 H), 3.41-3.36 (m, 1 H), 2.62 (dd, *J* = 8.9, 3.3 Hz, 1 H), 1.75-1.57 (m, 4 H), 1.03-0.98 (m, 12 H), 0.88 (s, 9 H), 0.68 (q, *J* = 7.9 Hz, 6 H), 0.14 (s, 3 H), 0.13 (s, 3 H); <sup>13</sup>C NMR (100 MHz, CDCl<sub>3</sub>)  $\delta$

154.0, 86.8, 79.1, 78.4, 70.3, 67.0, 37.7, 25.7, 23.8, 17.9, 15.8, 6.9, 5.0, -4.0, -5.1; IR (thin film) 3522, 2956, 1790, 1542, 1472, 1413, 1392, 1364, 1072, 1007, 940, 874  $\text{cm}^{-1}$ ; HRMS (CI,  $\text{NH}_3$ ) calcd for  $\text{C}_{21}\text{H}_{45}\text{Si}_2\text{O}_6$ , 449.2755  $m/z$  ( $\text{M} + \text{H}$ )<sup>+</sup>; observed, 449.2755  $m/z$ . Anal. Calcd for  $\text{C}_{21}\text{H}_{44}\text{Si}_2\text{O}_6$ : C, 56.21; H, 9.88. Found: C, 56.11; H, 9.90.

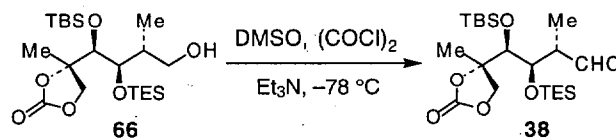

**(1S,2R,3S)-4-(tert-butyldimethylsilyloxy)-2-methyl-4-(4-methyl-2-oxo-[1,3]dioxolan-4-yl)-3-triethylsilyloxy-butyraldehyde (38).** To a -78 °C solution of DMSO (1.2 mL, 17 mmol) in 20 mL of  $\text{CH}_2\text{Cl}_2$  was added  $(\text{COCl})_2$  (1.1 mL, 13 mmol). The solution was stirred for -78 °C for 5 min, then a solution of the primary alcohol **66** was added dropwise via cannula (8.62 mmol in 20 mL of  $\text{CH}_2\text{Cl}_2$ ). The solution was stirred at -78 °C for 10 min and  $\text{Et}_3\text{N}$  (4.8 mL, 34 mmol) was added. The ice bath was removed and the solution was brought to room temperature. The solution was diluted with EtOAc and washed sequentially with  $\text{KHSO}_4$  (1M),  $\text{NaHCO}_3$  (sat), then brine. The organic layer was dried over  $\text{MgSO}_4$ , filtered and concentrated to provide 3.82 g of the crude aldehyde **38** which was used without purification in subsequent experiments:  $^1\text{H}$  NMR (500 MHz,  $\text{CDCl}_3$ )  $\delta$  9.63 (d,  $J = 3.4$  Hz, 1 H), 4.68 (A of AB,  $J = 8.6$  Hz, 1 H), 4.06 (B of AB,  $J = 8.6$  Hz, 1 H), 4.01 (dd,  $J = 5.4, 3.9$  Hz, 1 H), 3.95 (d,  $J = 3.2$  Hz, 1 H), 2.53-2.47 (m, 1 H), 1.54 (s, 3 H), 1.21 (d,  $J = 7.1$  Hz, 3 H), 0.97 (t,  $J = 8.0$  Hz, 9 H), 0.91 (s, 9 H), 0.64 (q,  $J = 7.9$  Hz, 6 H), 0.16 (s, 3 H), 0.14 (s, 3 H);  $^{13}\text{C}$  NMR (100 MHz,  $\text{CDCl}_3$ )  $\delta$  203.0, 154.0, 86.4, 77.2, 76.3, 70.3, 47.7, 25.7, 23.7, 18.0, 13.6, 6.8, 5.1, -4.1, -4.8; IR (thin film) 2956, 1799, 1732, 1539, 1472, 1464, 1456, 1417, 1393, 1362, 1327, 1255, 1197, 1172, 1071, 1007  $\text{cm}^{-1}$ ; HRMS (CI,  $\text{NH}_3$ ) calcd for  $\text{C}_{21}\text{H}_{46}\text{Si}_2\text{NO}_6$ , 464.2864  $m/z$  ( $\text{M} + \text{NH}_4$ )<sup>+</sup>; observed, 464.2866  $m/z$ .

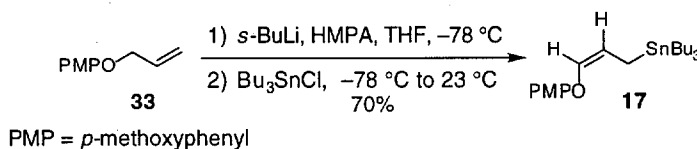

**(Z)- $\gamma$ -(4-methoxy-phenoxy)allyltributylstannane (17).** To a solution of **33** (14.8g, 90 mmol) in 150 mL of THF cooled to -78 °C, was added 75 mL of *s*-BuLi (1.27 M in cyclohexane, 95

mmol), followed immediately by the addition of HMPA (15 mL). The solution was stirred at  $-78\text{ }^{\circ}\text{C}$  for 15 min, then  $\text{Bu}_3\text{SnCl}$  (26 mL, 96 mmol) was added via syringe, and the  $-78\text{ }^{\circ}\text{C}$  bath was removed. The solution was stirred for 2 h at ambient temperature, then quenched with  $\text{NH}_4\text{Cl}$  (sat), diluted with hexanes and EtOAc and washed with  $\text{NaHCO}_3$  (sat), then  $\text{H}_2\text{O}$ . The organic phase was dried over  $\text{MgSO}_4$  and concentrated to afford a crude oil which was purified by distillation at reduced pressure (ca 0.3 mm Hg; b.p. 195 to 205  $^{\circ}\text{C}$ ) providing 28.7 g (70%) of **17**. The distilled product was used as is for the allylation of **38**, however a small portion was purified by HPLC (21 mm column, 100 % hexanes 15 min then 20% EtOAc/hexanes 10 min, 8 ml/min) to afford a sample for analytical characterization:  $^1\text{H}$  NMR (500 MHz,  $\text{CDCl}_3$ )  $\delta$  6.94-6.90 (m, 2 H), 6.86-6.83 (m, 2 H), 6.19-6.14 (m, 1 H), 4.99-4.94 (m, 1 H), 3.78 (s, 3 H), 1.87-1.72 (m, 2 H), 1.58-1.45 (m, 6 H), 1.35-1.26 (m, 6 H), 0.91-0.87 (m, 15 H);  $^{13}\text{C}$  NMR (125 MHz,  $\text{CDCl}_3$ )  $\delta$  154.7, 152.0, 137.4, 116.9, 114.5, 111.4, 55.7, 29.1, 27.4, 13.7, 9.4, 6.0; IR (thin film) 3043, 2956, 2925, 2871, 2853, 1652, 1591, 1505, 1465, 1442, 1418, 1373, 1340, 1292, 1241, 1225, 1180, 1153, 1102, 1052  $\text{cm}^{-1}$ ; HRMS (CI,  $\text{NH}_3$ ) calcd for  $\text{C}_{18}\text{H}_{29}\text{O}_2\text{SiSn}$ , 397.1190  $m/z$  ( $\text{M}-\text{C}_4\text{H}_9$ ) $^{+}$ ; observed, 397.1184  $m/z$ . Stereochemistry of **17** was confirmed by the observation of  $^1\text{H}$  nOe's between the two olefinic protons.

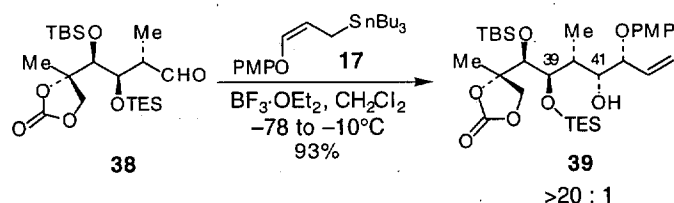

**4-[(1S,2R,3R,4R,5R)1-(*tert*-butyldimethylsilanyloxy)-4-hydroxy-5-(4-methoxyphenoxy)-3-methyl-2-triethylsilanyloxy-hept-6-enyl]-4-methyl-[1,3]dioxolan-2-one (39).** To a  $-78\text{ }^{\circ}\text{C}$  solution of the crude 2,3-*anti* aldehyde **38** (8.62 mmol) and the  $\gamma$ -alkoxyallylstannane **17** (5.5 g, 12.1 mmol) in 25 mL of  $\text{CH}_2\text{Cl}_2$  was added  $\text{BF}_3\cdot\text{OEt}_2$  (2.2 mL, 17.4 mmol). The reaction mixture was stirred at  $-78\text{ }^{\circ}\text{C}$  for 16 h, then warmed slowly to  $-20\text{ }^{\circ}\text{C}$  and quenched by the addition of 10 mL  $\text{NaHCO}_3$  (sat). The cold bath was removed and the solution was brought to room temperature. The solution was diluted with EtOAc and washed with  $\text{NaHCO}_3$  (sat) followed by brine. The organic layer was dried over  $\text{MgSO}_4$ , filtered and concentrated to provide **39** as a crude oil (>20 : 1 ds by  $^1\text{H}$  NMR analysis) which was purified by flash column chromatography [160 g

SiO<sub>2</sub> - 18 : 1 hexanes - EtOAc (1 L), 9 : 1 hexanes - EtOAc (1 L), 5 : 1 hexanes - EtOAc (1 L)] providing 4.92 g of analytically pure **39** (93% over 2 steps): [ $\alpha$ ]<sub>D</sub><sup>24</sup> +16.3° (c 1.0, CH<sub>2</sub>Cl<sub>2</sub>); <sup>1</sup>H NMR (500 MHz, CDCl<sub>3</sub>)  $\delta$  6.89-6.86 (m, 2 H), 6.82-6.79 (m, 2 H), 5.68 (ddd, *J* = 17.6, 10.4, 7.4 Hz, 1 H), 5.33-5.28 (m, 1 H), 4.70 (d, *J* = 7.8 Hz, 1 H), 4.37 (dd, *J* = 8.2, 8.2 Hz, 1 H), 4.05 (d, *J* = 2.7 Hz, 1 H), 3.99 (d, *J* = 8.5 Hz, 1 H), 3.95 (d, *J* = 7.8 Hz, 1 H), 3.84 (dd, *J* = 9.5, 2.7 Hz, 1 H), 3.76 (s, 3 H), 2.57 (s, 1 H), 1.6-1.5 (m, 1 H), 1.52 (s, 3 H), 1.06 (d, *J* = 6.6 Hz, 3 H), 1.01 (t, *J* = 7.9 Hz, 9 H), 0.90 (s, 9 H), 0.75-0.66 (m, 6 H), 0.15 (s, 3 H), 0.14 (s, 3 H); <sup>13</sup>C NMR (100 MHz, CDCl<sub>3</sub>)  $\delta$  154.26, 154.2, 151.8, 134.4, 120.2, 118.4, 114.5, 86.9, 84.0, 77.2, 75.1, 71.7, 70.4, 55.6, 36.1, 25.8, 23.8, 18.1, 10.2, 7.1, 5.3, -4.1, -4.8; IR (thin film) 3586, 2955, 2881, 1808, 1644, 1614, 1593, 1505, 1471, 1417, 1392, 1365, 1225, 1101, 1006 cm<sup>-1</sup>; HRMS (CI, NH<sub>3</sub>) calcd for C<sub>31</sub>H<sub>58</sub>Si<sub>2</sub>NO<sub>8</sub>, 628.3701 *m/z* (M + NH<sub>4</sub>)<sup>+</sup>; observed, 628.3699 *m/z*.

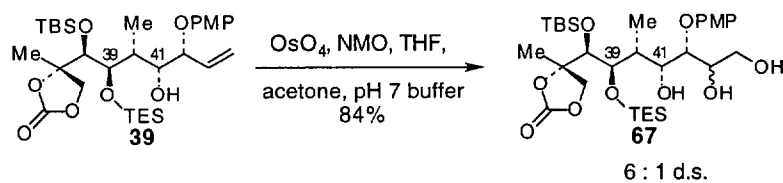

**4-[1-(*tert*-butyldimethylsilyloxy)-5-(4-methoxy-phenoxy)-3-methyl-2-triethylsilyloxy-hept-4,6,7-triol]-4-methyl-[1,3]dioxolan-2-one (67).** To a solution of the terminal olefin **39** (175 mg, 0.29 mmol) in 3 mL THF, 2 mL acetone, and 1 mL pH7 buffer was added 137  $\mu$ L of a 50% solution of NMO<sup>4</sup> in (0.58 mmol) followed by 150  $\mu$ L of a 0.2M solution of OsO<sub>4</sub> in toluene (0.03 mmol). The solution was stirred at ambient temperature for ca. 48 h, after which time the reaction was quenched with sodium sulfite and stirred vigorously for 1 h. The solution was diluted with EtOAc and washed with NaHCO<sub>3</sub> (sat) and brine. The organic layer was dried over MgSO<sub>4</sub>, filtered and concentrated to afford the crude diol **67**. This material was purified by flash column chromatography eluting with hexanes/EtOAc, giving 157 mg (84%) diol **67**, as a 6 : 1 mixture of diastereomeric diols: <sup>1</sup>H NMR (500 MHz, CDCl<sub>3</sub>)  $\delta$  6.95-6.93 (m, 2 H), 6.83-6.81 (m, 2 H), 4.65 (d, *J* = 7.8 Hz, 1 H), 4.26 (dd, *J* = 5.6, 5.6 Hz, 1 H), 4.19 (ddd, *J* = 7.1, 5.1, 1.8 Hz, 1 H), 4.01 (d, *J* = 3.2 Hz, 1 H), 3.97 (d, *J* = 7.8 Hz, 1 H), 3.90-3.88 (m, 1 H), 3.79-3.74 (m, 2 H), 3.76 (s, 3 H), 3.70-3.65 (m, 1 H), 2.89 (d, *J* = 5.6 Hz, 1 H), 2.68 (d, *J* = 6.6 Hz, 1 H), 2.11 (dd, *J* = 5.5, 5.5 Hz, 1 H), 1.75-1.72 (m, 1 H), 1.50 (s, 3 H), 1.11 (d, *J* = 6.6 Hz, 3 H), 0.98 (t, *J* = 7.8 Hz, 9 H), 0.88 (s, 9

H), 0.70-0.65 (m, 6 H), 0.14 (s, 3 H), 0.12 (s, 3 H);  $^{13}\text{C}$  NMR (100 MHz,  $\text{CDCl}_3$ )  $\delta$  154.6, 154.3, 152.5, 117.0, 114.9, 94.4, 86.9, 81.0, 77.2, 76.0, 72.2, 70.5, 69.8, 63.1, 55.7, 38.0, 25.8, 23.8, 18.0, 11.4, 7.0, 5.1, -4.0, -5.0; IR (thin film) 3469, 2956, 2936, 2881, 1798, 1507, 1465, 1443, 1391, 1365, 1288, 1226, 1180, 1158, 1100, 1070, 1007  $\text{cm}^{-1}$ ; HRMS (CI,  $\text{NH}_3$ ) calcd for  $\text{C}_{31}\text{H}_{60}\text{Si}_2\text{NO}_{10}$ , 662.3756  $m/z$  ( $\text{M} + \text{NH}_4$ ) $^+$ ; observed, 662.3764  $m/z$ .

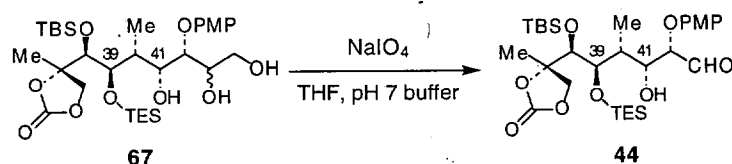

**(2S,3R,4R,5R,6S)-6-(tert-butyldimethylsilyloxy)-2-(4-methoxy-phenoxy)-4-methyl-6-((2S)-4-methyl-2-oxo-[1,3]dioxolan-4yl)-5-triethylsilyloxy-3-hydroxy-hexanal (44).** The crude diol **67** (0.24 mmol) was diluted in 2 mL THF and 1 mL pH 7 buffer, and  $\text{NaIO}_4$  (0.93 mmol) was added. The solution was stirred at ambient temperature for 2 h, then was diluted with EtOAc and washed with  $\text{NaHCO}_3$  followed by brine. The organic layer was dried over  $\text{MgSO}_4$ , filtered and concentrated to afford the crude aldehyde **44** which was used in subsequent experiments without purification:  $^1\text{H}$  NMR (500 MHz,  $\text{CDCl}_3$ )  $\delta$  9.71-9.70 (m, 1 H), 6.86-6.83 (m, 4 H), 4.68 (d,  $J = 7.8$  Hz, 1 H), 4.36 (dd,  $J = 7.2, 2.6$  Hz, 1 H), 4.31-4.28 (m, 1 H), 4.04 (d,  $J = 11.2$  Hz, 1 H), 4.04 (s, 3 H), 3.81 (dd,  $J = 9.0, 2.9$  Hz, 1 H), 3.77 (s, 3 H), 2.48 (d,  $J = 4.2$  Hz, 1 H), 1.65-1.59 (m, 1 H), 1.48 (s, 3 H), 1.15 (d,  $J = 6.6$  Hz, 3 H), 1.00 (t,  $J = 7.9$  Hz, 9 H), 0.90 (s, 9 H), 0.70 (q,  $J = 7.7$  Hz, 6 H), 0.16 (s, 3 H), 0.14 (s, 3 H);  $^{13}\text{C}$  NMR (100 MHz,  $\text{CDCl}_3$ )  $\delta$  202.6, 155.2, 154.1, 151.3, 116.7, 115.0, 86.8, 84.7, 75.5, 70.3, 68.7, 55.7, 36.5, 25.8, 23.8, 18.0, 11.2, 7.0, 5.1, -4.1, -5.0; IR (thin film) 3505, 2955, 2880, 2859, 1803, 1733, 1594, 1508, 1465, 1392, 1364, 1225, 1071  $\text{cm}^{-1}$ ; HRMS (CI,  $\text{NH}_3$ ) calcd for  $\text{C}_{30}\text{H}_{56}\text{Si}_2\text{NO}_9$ , 630.3494  $m/z$  ( $\text{M} + \text{NH}_4$ ) $^+$ ; observed, 630.3520  $m/z$ .

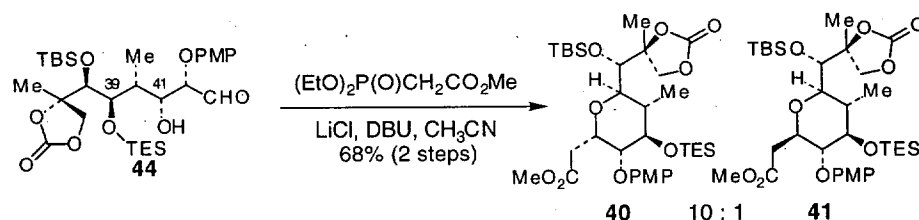

**[6-[1'-(*tert*-butyldimethylsilyloxy)-1'-(4-methyl-2-oxo-[1,3]dioxolan-4-yl)-methyl]-4-triethylsilyloxy-3-(4-methoxy-phenoxy)-5-methyl-tetrahydro-pyran-2-yl]-acetic acid methyl ester (40).** To a suspension of LiCl (148 mg, 3.5 mmol) in 2 mL of CH<sub>3</sub>CN was added the phosphonate (185  $\mu$ L, 1.0 mmol) followed by DBU (150  $\mu$ L, 1.0 mmol), followed by a solution of the crude aldehyde **44** (0.24 mmol) in 2 mL of CH<sub>3</sub>CN. The solution was stirred at room temperature for 23 h, then was diluted with EtOAc and washed sequentially with NH<sub>4</sub>Cl (sat), NaHCO<sub>3</sub> (sat), and brine. The organic layer was dried over MgSO<sub>4</sub>, filtered and concentrated to afford a crude oil which was purified by flash column chromatography [30 g SiO<sub>2</sub> - 100% hexanes (200 mL), 9 : 1 hexanes : EtOAc (200 mL), 4 : 1 hexanes : EtOAc (250 mL)] affording 109 mg of a 10 : 1 mixture of diastereomeric pyrans **40** and **41**. The pyrans were separated by HPLC to obtain analytically pure **40** and **41**. Data for **40**:  $[\alpha]_D^{23} +2.0^\circ$  (*c* 2.1, CH<sub>2</sub>Cl<sub>2</sub>); <sup>1</sup>H NMR (500 MHz, CDCl<sub>3</sub>)  $\delta$  6.87-6.81 (m, 4 H), 4.69-4.65 (m, 2 H), 4.11 (dd, *J* = 9.0, 5.9 Hz, 1 H), 3.97 (s, 3 H), 3.87 (d, *J* = 9.0 Hz, 1 H), 3.77 (s, 3 H), 3.62 (s, 3 H), 3.55 (dd, *J* = 9.4, 9.4 Hz, 1 H), 3.34 (d, *J* = 10.7, 1 H), 2.69-2.56 (m, 2 H), 2.02-1.94 (m, 2 H), 1.36 (s, 3 H), 1.00 (d, *J* = 6.3 Hz, 3 H), 0.94 (s, 9 H), 0.89 (t, *J* = 7.9 Hz, 9 H), 0.61-0.53 (m, 6 H), 0.14 (s, 6 H); <sup>13</sup>C NMR (75 MHz, CDCl<sub>3</sub>)  $\delta$  171.3, 154.3, 150.7, 116.6, 114.7, 86.6, 78.1, 74.2, 73.4, 73.0, 70.6, 70.5, 55.7, 51.9, 38.4, 30.9, 26.2, 22.7, 18.7, 14.2, 7.0, 5.4, -4.0, -4.4; IR (thin film) 2954, 2878, 2559, 2058, 2000, 1960, 1804, 1741, 1593, 1507, 1463, 1439, 1416, 1389, 1365, 1319, 1277, 1226, 1195, 1170, 1139, 1097, 1053 cm<sup>-1</sup>; HRMS (CI, NH<sub>3</sub>) calcd for C<sub>33</sub>H<sub>56</sub>Si<sub>2</sub>O<sub>10</sub>, 668.3412 *m/z* (M + H)<sup>+</sup>; observed, 668.3419 *m/z*.

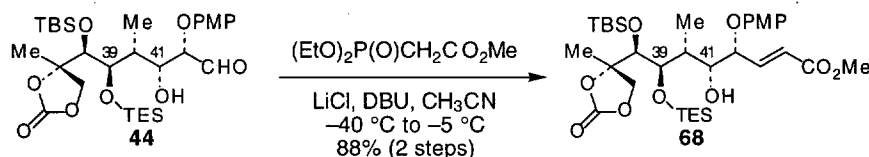

**(4*R*,5*R*,6*R*,7*R*,8*S*,4'*S*)-8-(*tert*-butyldimethylsilyloxy)-5-hydroxy-4-(4-methoxy-phenoxy)-6-methyl-8-(4'-methyl-2-oxo-[1,3]dioxolan-4-yl)-7-triethylsilyloxy-oct-2-enoic acid methyl ester (68).** To a heterogeneous solution of LiCl (78 mg, 1.8 mmol) in 3 mL of CH<sub>3</sub>CN was added the methyl diethylphosphonoacetate (335  $\mu$ L, 1.8 mmol) followed by DBU (275  $\mu$ L, 1.8 mmol). The solution was cooled to -40 °C and the crude aldehyde **44** (0.61 mmol) was added as a solution in 4 mL of CH<sub>3</sub>CN. The solution was warmed over 50 min from



−40 °C to −5 °C, then quenched with NaHCO<sub>3</sub> (sat). The solution was diluted with EtOAc and washed sequentially with KHSO<sub>4</sub> (1M), NaHCO<sub>3</sub> (sat), then brine. The organic layer was dried over MgSO<sub>4</sub>, filtered and concentrated to provide a crude oil which was purified by flash column chromatography [40 g SiO<sub>2</sub> - 6 : 1 hexanes - EtOAc (350 mL), 4 : 1 hexanes - EtOAc (500 mL)] providing 357 mg of the desired enoate **68** (88%): [ $\alpha$ ]<sub>D</sub><sup>23</sup> −2.8° (c 1.5, CH<sub>2</sub>Cl<sub>2</sub>); <sup>1</sup>H NMR (500 MHz, CDCl<sub>3</sub>)  $\delta$  6.84-6.78 (m, 5 H), 6.03 (dd, *J* = 15.9, 1.0 Hz, 1 H), 4.68 (d, *J* = 7.8 Hz, 1 H), 4.56 (dd, *J* = 7.2, 7.2 Hz, 1 H), 4.02 (d, *J* = 2.4 Hz, 1 H), 4.02-4.00 (m, 1 H), 3.94 (d, *J* = 7.8 Hz, 1 H), 3.82 (dd, *J* = 9.2, 2.6 Hz, 1 H), 3.75 (s, 3 H), 3.72 (s, 3 H), 2.61 (d, *J* = 1 Hz, 1 H), 1.6-1.48 (m, 1 H), 1.48 (s, 3 H), 1.08 (d, *J* = 6.6 Hz, 3 H), 0.99 (t, *J* = 7.9 Hz, 9 H), 0.88 (s, 9 H), 0.73-0.65 (m, 6 H), 0.133 (s, 3 H), 0.127 (s, 3 H); <sup>13</sup>C NMR (100 MHz, CDCl<sub>3</sub>)  $\delta$  165.6, 154.8, 154.1, 151.3, 142.9, 124.3, 117.8, 114.7, 86.7, 81.5, 77.2, 75.2, 72.2, 70.4, 55.6, 51.8, 36.4, 25.7, 23.7, 18.1, 10.6, 7.0, 5.4, −4.2, −4.8; IR (thin film) 3513, 2954, 2880, 2859, 1805, 1727, 1659, 1508, 1466, 1439, 1390, 1364, 1280, 1226, 1172, 1102, 1071 cm<sup>−1</sup>; HRMS (CI, NH<sub>3</sub>) calcd for C<sub>33</sub>H<sub>60</sub>Si<sub>2</sub>NO<sub>10</sub>, 686.3756 *m/z* (M + NH<sub>4</sub>)<sup>+</sup>; observed, 686.3752 *m/z*.

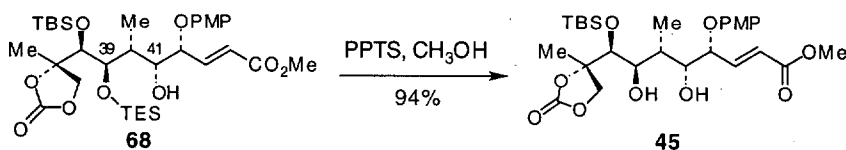

**(4*R*,5*R*,6*R*,7*R*,8*S*,4'*S*)-8-(*tert*-butyldimethylsilyloxy)-4-(4-methoxyphenoxy)-5,7-dihydroxy-6-methyl-8-(4'-methyl-2-oxo-[1,3]dioxolan-4-yl)-oct-enoic acid methyl ester (45).** To a solution of enoate **68** (201 mg, 0.30 mmol) in 4 mL of CH<sub>3</sub>OH was added PPTS (178mg, 0.71 mmol). The solution was stirred at ambient temperature for 71 h, then was diluted with EtOAc and washed sequentially with NaHCO<sub>3</sub> and brine. The organic layer was dried over MgSO<sub>4</sub>, filtered and concentrated to provide an oil which was purified by flash column chromatography [40 g SiO<sub>2</sub> - 4 : 1 hexanes : EtOAc (250 mL), 1 : 1 hexanes : EtOAc (500 mL)] providing 156 mg of the diol **45** (94%): [ $\alpha$ ]<sub>D</sub><sup>23.6</sup> −24.5 (c 0.7, CH<sub>2</sub>Cl<sub>2</sub>); <sup>1</sup>H NMR (500 MHz, CDCl<sub>3</sub>)  $\delta$  6.90-6.79 (m, 5 H), 6.05 (dd, *J* = 15.9, 1.0 Hz, 1 H), 4.60 (ddd, *J* = 7.8, 7.8, 1.0 Hz, 1 H), 4.16 (ddd, *J* = 8.2, 4.5, 2.3 Hz, 1 H), 4.08 (d, *J* = 8.8 Hz, 1 H), 3.99 (s, 1 H), 3.76 (s, 3 H), 3.71 (s, 3 H), 3.62 (dd, *J* = 9.9, 9.9 Hz, 1 H), 2.79 (d, *J* = 1.2 Hz, 1 H), 2.04 (d, *J* = 9.8 Hz, 1 H), 1.85-1.82 (m, 1 H), 1.52 (s, 3 H), 0.95 (d,

$J = 6.6$  Hz, 3 H), 0.87 (s, 9 H), 0.16 (s, 3 H), 0.09 (s, 3 H);  $^{13}\text{C}$  NMR (100 MHz,  $\text{CDCl}_3$ )  $\delta$  165.6, 154.9, 154.2, 151.3, 142.5, 124.7, 117.7, 114.7, 86.5, 81.3, 77.2, 73.5, 72.4, 72.2, 70.5, 55.7, 51.7, 36.1, 25.9, 23.4, 18.3, 10.0, -4.1, -4.7; IR (thin film) 3494, 2953, 2858, 1798, 1726, 1661, 1506, 1464, 1439, 1390, 1362, 1280, 1226, 1170, 1114, 1051  $\text{cm}^{-1}$ ; HRMS (CI,  $\text{NH}_3$ ) calcd for  $\text{C}_{27}\text{H}_{43}\text{SiO}_{10}$ , 555.2626  $m/z$  ( $\text{M} + \text{H}^+$ ); observed, 555.2618  $m/z$ . *Anal.* Calcd for  $\text{C}_{27}\text{H}_{42}\text{SiO}_{10}$ : C, 58.46; H, 7.63. Found: C, 58.04; H, 7.51.

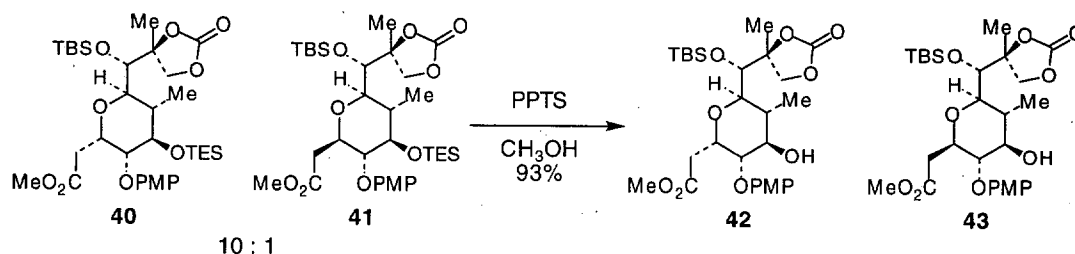

[6-[1'-(*tert*-butyl-dimethyl-silanyloxy)-1'-(4-methyl-2-oxo-[1,3]dioxolan-4-yl)-methyl]-4-hydroxy-3-(4-methoxy-phenoxy)-5-methyl-tetrahydro-pyran-2-yl]-acetic acid methyl ester (42) and [6-[1'-(*tert*-butyl-dimethyl-silanyloxy)-1'-(4-methyl-2-oxo-[1,3]dioxolan-4-yl)-methyl]-4-hydroxy-3-(4-methoxy-phenoxy)-5-methyl-tetrahydro-pyran-2-yl]-acetic acid methyl ester (43). **Method A:** To a solution of the pyrans 40 and 41 (200 mg, 0.3 mmol) in methanol (4 mL) was added PPTS (179 mg). The solution was stirred at ambient temperature for 1.25 h, after which time was diluted with EtOAc and washed with  $\text{NaHCO}_3$  (sat) then brine). The organic layer was then dried over  $\text{MgSO}_4$ , filtered and concentrated to provide 154 mg (93%) of a mixture of secondary alcohols 42 and 43 which was used without purification in the subsequent equilibration study.

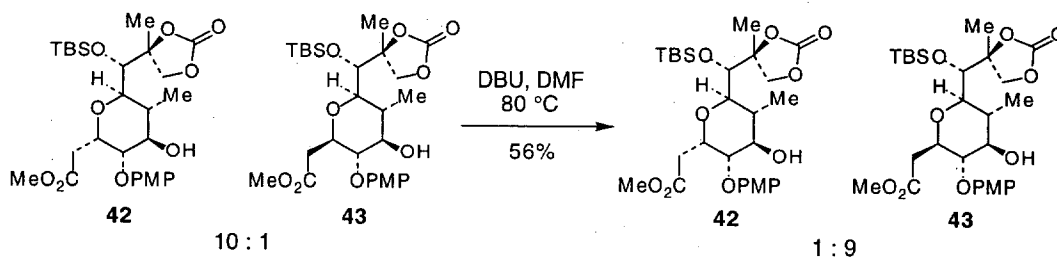

**Method B:** To a solution of a 10 : 1 mixture of pyrans 42 and 43 (55 mg, 0.1 mmol) in 2.5 mL of DMF, was added 300  $\mu\text{L}$  DBU (2 mmol). The solution was heated at 80  $^{\circ}\text{C}$  for ca. 12 h, then for 8 h at 100  $^{\circ}\text{C}$ . The solution was cooled to ambient temperature, diluted with EtOAc and washed

sequentially with  $\text{KHSO}_4$  (1M),  $\text{NaHCO}_3$  (sat), then brine. The organic layer was dried over  $\text{MgSO}_4$ , filtered and concentrated to provide a crude oil which was purified by flash column chromatography [15 g  $\text{SiO}_2$  - 100% hexanes (150 mL), 4 : 1 hexanes - EtOAc (250 mL), 1 : 1 hexanes - EtOAc (200 mL)] affording 31 mg of a 1 : 9 mixture of pyrans **42** : **43** (56%).

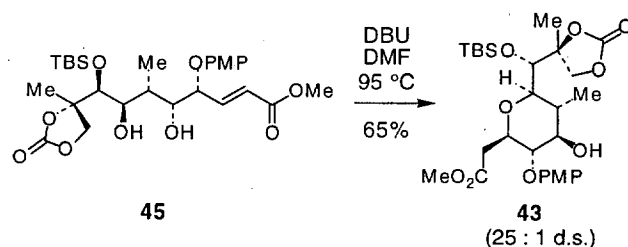

**Method C:** To a solution of the diol **45** (339 mg, 0.6 mmol) in 12 mL of anhydrous DMF, was added 1.8 mL of DBU (12 mmol). The solution was heated to 95 °C and stirred at that temperature for 22 h. The solution was cooled to ambient temperature, diluted with EtOAc and washed sequentially with  $\text{KHSO}_4$  (1M),  $\text{NaHCO}_3$  (sat), then brine. The combined aqueous phase was extracted with EtOAc, and then the EtOAc from this extraction was washed with  $\text{KHSO}_4$  (1M),  $\text{NaHCO}_3$  (sat), then brine. The combined organic layers were dried over  $\text{Na}_2\text{SO}_4$ , filtered and concentrated to provide the crude product **43** as a 25 : 1 mixture of diastereomeric pyrans. The material was purified via flash column chromatography [40 g  $\text{SiO}_2$  - 100% hexanes (200 mL), 3 : 1 hexanes - EtOAc (400 mL), 1 : 1 hexanes - EtOAc (400 mL)] to give 222 mg of the purified mixture of pyran diastereomers (25 : 1 d.s.; 65%).

**Data for 42:**  $[\alpha]_{\text{D}}^{23} -2.4^\circ$  (*c* 0.63,  $\text{CH}_2\text{Cl}_2$ );  $^1\text{H}$  NMR (500 MHz,  $\text{CDCl}_3$ )  $\delta$  6.92-6.90 (m, 2 H), 6.84-6.82 (m, 2 H), 4.72 (ddd,  $J = 9.9, 5.6, 3.2$  Hz, 1 H), 4.66 (d,  $J = 9.0$  Hz, 1 H), 4.09 (dd,  $J = 9.2, 6.0$  Hz, 1 H), 3.99 (s, 1 H), 3.87 (d,  $J = 9.0$  Hz, 1 H), 3.77 (s, 3 H), 3.65 (s, 3 H), 3.54 (dd,  $J = 9.8, 9.8$  Hz, 1 H), 3.35 (d,  $J = 10.5$  Hz, 1 H), 2.72-2.59 (m, 2 H), 2.48 (d,  $J = 2.2$  Hz, 1 H), 2.04-1.99 (m, 1 H), 1.37 (s, 3 H), 1.07 (d,  $J = 6.6$  Hz, 3 H), 0.93 (s, 9 H), 0.15 (s, 3 H), 0.14 (s, 3 H);  $^{13}\text{C}$  NMR (100 MHz,  $\text{CDCl}_3$ )  $\delta$  171.4, 155.0, 154.4, 151.2, 117.5, 114.9, 86.5, 79.6, 74.2, 73.1, 71.9, 70.7, 70.5, 55.7, 52.0, 36.9, 30.6, 26.1, 22.6, 18.5, 13.5, -4.1, -4.5; IR (thin film) 3500, 2954, 2933, 2898, 2858, 1801, 1738, 1507, 1464, 1439, 1389, 1364, 1320, 1276, 1260, 1226, 1196, 1169, 1135, 1113, 1078, 1054  $\text{cm}^{-1}$ ; HRMS (CI,  $\text{NH}_3$ ) calcd for  $\text{C}_{27}\text{H}_{43}\text{SiO}_{10}$ , 555.2626  $m/z$  ( $\text{M} + \text{H}$ ) $^+$ ; observed, 555.2610  $m/z$ .

**Data for 43:**  $[\alpha]_D^{23} +66.4^\circ$  ( $c$  1.1,  $\text{CH}_2\text{Cl}_2$ );  $^1\text{H}$  NMR (500 MHz,  $\text{CDCl}_3$ )  $\delta$  6.96-6.94 (m, 2 H), 6.82-6.80 (m, 2 H), 4.60 (d,  $J$  = 8.8 Hz, 1 H), 4.00 (s, 1 H), 3.79-3.71 (m, 2 H), 3.76 (s, 3 H), 3.68 (s, 3 H), 3.49 (ddd,  $J$  = 11.8, 9.9, 3.2 Hz, 1 H), 3.17 (d,  $J$  = 10.3 Hz, 1 H), 2.69 (d,  $J$  = 16.1 Hz, 1 H), 2.35-2.29 (m, 2 H), 2.04-1.99 (m, 1 H), 1.46 (s, 3 H), 1.05 (d,  $J$  = 6.3 Hz, 3 H), 0.92 (s, 9 H), 0.15 (s, 3 H), 0.13 (s, 3 H);  $^{13}\text{C}$  NMR (100 MHz,  $\text{CDCl}_3$ )  $\delta$  171.5, 154.7, 154.4, 153.1, 117.4, 114.9, 110.1, 94.4, 86.8, 81.8, 80.7, 77.7, 77.2, 75.3, 73.2, 70.4, 55.7, 51.9, 36.9, 26.1, 23.1, 18.6, 13.5, -4.2, -4.5; IR (thin film) 3496, 2954, 2933, 2896, 2859, 1802, 1740, 1507, 1464, 1440, 1389, 1228, 1054  $\text{cm}^{-1}$ ; HRMS (CI,  $\text{NH}_3$ ) calcd for  $\text{C}_{27}\text{H}_{42}\text{SiO}_{10}$ , 554.2547  $m/z$  ( $\text{M}^+$ ); observed, 554.2524  $m/z$ .

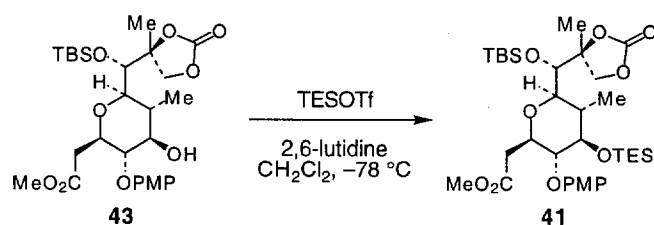

**[6-[1-(*tert*-butyl-dimethyl-silanyloxy)-1-(4-methyl-2-oxo-[1,3]dioxolan-4-yl)-methyl]-4-triethylsilanyloxy-3-(4-methoxy-phenoxy)-5-methyl-tetrahydro-pyran-2-yl]-acetic acid methyl ester (41).** To a solution of the pyran **43** (518 mg, 0.93mmol) in 10 mL of  $\text{CH}_2\text{Cl}_2$  was added 2,6-lutidine (163  $\mu\text{l}$ , 1.40 mmol). The solution was cooled to  $-78^\circ\text{C}$  and TESOTf (267  $\mu\text{l}$ , 1.18 mmol) was added via syringe. The solution was warmed from  $-78^\circ\text{C}$  to  $-40^\circ\text{C}$  over 1.25 h, then the reaction was quenched by addition of  $\text{CH}_3\text{OH}$ . The solution was warmed to ambient temperature, diluted with EtOAc and washed sequentially with  $\text{NaHCO}_3$  (sat),  $\text{KHSO}_4$  (1 M; two times),  $\text{NaHCO}_3$  (sat), then brine. The organic layer was dried over  $\text{Na}_2\text{SO}_4$ , filtered and concentrated to afford the crude silylated pyran **41**, which was used directly in the next step without purification. A small portion was synthesized and purified via the above procedure to obtain analytically pure **41**:  $[\alpha]_D^{24} +53.2^\circ$  ( $c$  1.0,  $\text{CH}_2\text{Cl}_2$ );  $^1\text{H}$  NMR (500 MHz,  $\text{CDCl}_3$ )  $\delta$  6.87-6.85 (m, 2 H), 6.80-6.78 (m, 2 H), 4.59 (d,  $J$  = 8.9 Hz, 1 H), 3.98 (s, 1 H), 3.81-3.75 (m, 5 H), 3.69 (ddd,  $J$  = 9.9, 9.9, 1.6 Hz, 1 H), 3.65 (s, 3 H), 3.50 (dd,  $J$  = 9.0, 9.0 Hz, 1 H), 3.14 (d,  $J$  = 10.4 Hz, 1 H), 2.58 (dd,  $J$  = 16.2, 1.6 Hz, 1 H), 2.22 (dd,  $J$  = 16.4, 10.5 Hz, 1 H), 1.99-1.94 (m, 1 H), 1.45 (s, 3 H), 0.99 (d,  $J$  = 6.6 Hz, 3 H), 0.93 (s, 9 H), 0.85 (t,  $J$  = 7.9 Hz, 9 H), 0.48 (q,  $J$  = 8.0 Hz, 6 H), 0.14 (d,  $J$  = 9.0 Hz, 6 H);  $^{13}\text{C}$

NMR (100 MHz,  $\text{CDCl}_3$ )  $\delta$  171.7, 154.4, 154.0, 153.0, 116.7, 114.5, 86.9, 80.6, 80.4, 78.2, 75.9, 73.4, 70.4, 55.6, 51.8, 38.4, 37.1, 26.1, 23.0, 18.6, 14.1, 6.8, 5.1, -4.1, -4.6; IR (thin film) 2954, 2937, 2878, 2860, 1805, 1741, 1506, 1464, 1539, 1415, 1388, 1322, 1276, 1253, 1229, 1193, 1172, 1137, 1116, 1077, 1057, 1007  $\text{cm}^{-1}$ ; HRMS (CI,  $\text{NH}_3$ ) calcd for  $\text{C}_{33}\text{H}_{57}\text{Si}_2\text{O}_{10}$ , 669.3690  $m/z$  ( $\text{M} + \text{H}$ )<sup>+</sup>; observed, 669.3469  $m/z$ .

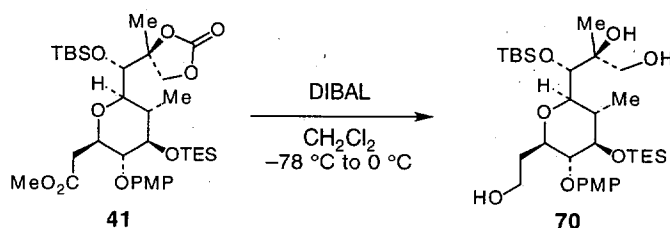

**3-(*tert*-butyl-dimethyl-silanyloxy)-3-[4'-triethylsilanyloxy-5'-(4-methoxyphenoxy)-6'-hydroxyethyl-3'-methyl-tetrahydro-pyran-2'-yl]-2-methyl-1,2-propanediol (70).** To a -78 °C solution of the crude silyl ether **41** (ca. 0.93 mmol) in 10 mL of  $\text{CH}_2\text{Cl}_2$  was added 6.5 mL DIBAL (1.0 M in hexanes). The solution was stirred at -78 °C for 3.5 h, then the reaction was quenched with  $\text{CH}_3\text{OH}$  (1 mL). The mixture was then warmed to ambient temperature, and 7 mL of a saturated solution of Rochelle's salt was added. The solution was stirred until the aluminum salts dissolved, then the solution was diluted with EtOAc, washed with  $\text{NaHCO}_3$  (sat) and brine. The combined aqueous layers were extracted with EtOAc and this solution was washed once with brine. The combined organic layers were dried over  $\text{Na}_2\text{SO}_4$ , filtered and concentrated to provide the crude triol **70** which was used directly in the next step. A small quantity was synthesized via the above procedure to and characterize as the crude oil **70**:  $^1\text{H}$  NMR (500 MHz,  $\text{CDCl}_3$ )  $\delta$  6.87-6.86 (m, 2 H), 6.79-6.77 (m, 2 H), 3.88 (dd,  $J = 8.9, 8.9$  Hz, 1 H), 3.76-3.54 (m, 8 H), 3.47 (dd,  $J = 9.0, 9.0$  Hz, 1 H), 3.42 (br d,  $J = 9.0$  Hz, 1 H), 3.26 (d,  $J = 10.5$  Hz, 1 H), 3.11 (s, 1 H), 2.90 (br s, 1 H), 2.67 (b s, 1 H), 1.94-1.84 (m, 2 H), 1.56-1.48 (m, 1 H), 1.12 (s, 3 H), 0.98 (d,  $J = 6.6$  Hz, 3 H), 0.93 (s, 9 H), 0.85 (t,  $J = 7.9$  Hz, 9 H), 0.48 (q,  $J = 8.1$  Hz, 6 H), 0.16 (s, 6 H);  $^{13}\text{C}$  NMR (100 MHz,  $\text{CDCl}_3$ )  $\delta$  153.8, 153.4, 116.7, 114.4, 81.3, 78.6, 77.8, 75.6, 74.0, 68.1, 59.8, 55.6, 39.9, 34.2, 26.1, 21.6, 18.5, 13.9, 6.9, 5.2 -3.9, -4.1; IR (thin film) 3402, 2955, 2878, 1506, 1464, 1418, 1376, 1290, 1230, 1181, 1150, 1081, 1045, 1013  $\text{cm}^{-1}$ ; HRMS (CI,  $\text{NH}_3$ ) calcd for  $\text{C}_{31}\text{H}_{59}\text{Si}_2\text{O}_8$ , 615.3749  $m/z$  ( $\text{M} + \text{H}$ )<sup>+</sup>; observed, 615.3736  $m/z$ .

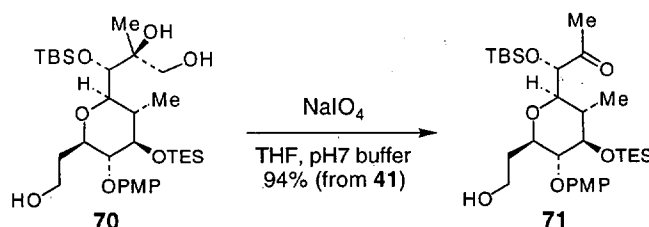

**1-(4-triethylsilanyloxy-5-(4-methoxy-phenoxy)-6-(hydroxyethyl)-tetrahydro-pyran-2-yl)-1-(tert-butyl-dimethyl-silanyloxy)-propan-2-one (71).** To a solution of the crude triol **70** (ca. 0.93 mmol) in 12 mL of THF and 4 mL pH7 buffer was added  $\text{NaIO}_4$  (600 mg, 2.8 mmol). The solution was stirred at ambient temperature for 1.5 h, then more  $\text{NaIO}_4$  (200 mg, 0.94 mmol) was added. The solution was stirred for an additional 45 min, then was diluted with EtOAc, and washed sequentially with  $\text{NaHCO}_3$  (sat) and brine. The organic layer was dried over  $\text{Na}_2\text{SO}_4$ , filtered and concentrated to afford the crude ketone which was purified by flash column chromatography [70 g  $\text{SiO}_2$  - 100% hexanes (200 mL), 3 : 1 hexanes - EtOAc (800 mL)] providing 510 mg (94%) of the desired ketone **72**:  $[\alpha]_{\text{D}}^{23} +26.5^\circ$  (*c* 2.3,  $\text{CH}_2\text{Cl}_2$ );  $^1\text{H}$  NMR (500 MHz,  $\text{CDCl}_3$ )  $\delta$  6.88-6.86 (m, 2 H), 6.77-6.75 (m, 2 H), 4.11 (s, 1 H), 3.94 (dd,  $J = 8.9, 8.9$  Hz, 1 H), 3.74 (s, 1 H), 3.57-3.47 (m, 4 H), 3.37 (d,  $J = 10.5$  Hz, 1 H), 2.26 (b s, 1 H), 2.20 (s, 3 H), 1.94-1.82 (m, 2 H), 1.58-1.51 (m, 1 H), 0.99 (d,  $J = 6.6$  Hz, 3 H), 0.97 (s, 9 H), 0.85 (t,  $J = 7.8$  Hz, 9 H), 0.49 (q,  $J = 8.0$  Hz, 6 H), 0.08 (s, 6 H);  $^{13}\text{C}$  NMR (100 MHz,  $\text{CDCl}_3$ )  $\delta$  212.1, 153.8, 153.3, 116.8, 114.3, 83.1, 80.6, 78.3, 78.2, 77.9, 59.8, 55.6, 38.7, 33.4, 27.2, 25.8, 18.2, 13.5, 6.9, 5.1, -4.5, -4.8; IR (thin film) 3452, 2955, 2934, 2878, 2859, 1734, 1715, 1592, 1506, 1464, 1442, 1416, 1376, 1350, 1290, 1230, 1181, 1136, 1086, 1044, 1012  $\text{cm}^{-1}$ ; HRMS (CI,  $\text{NH}_3$ ) calcd for  $\text{C}_{30}\text{H}_{55}\text{Si}_2\text{O}_7$ , 583.3486  $m/z$  ( $\text{M} + \text{H}^+$ ); observed, 583.3484  $m/z$ .

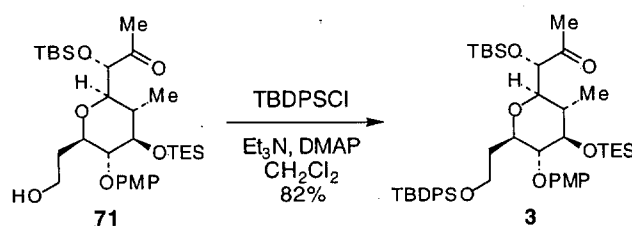

**1-(4-triethylsilanyloxy-5-(4-methoxy-phenoxy)-6-(tert-butyl-diphenyl-silanyloxy-ethyl)-tetrahydro-pyran-2-yl)-1-(tert-butyl-dimethyl-silanyloxy)-propan-2-**

**one (3).** To a solution of the primary carbinol **71** (245 mg, 0.42 mmol) in 2 mL of CH<sub>2</sub>Cl<sub>2</sub> was added Et<sub>3</sub>N (88  $\mu$ L, 0.63 mmol), followed by DMAP (cat.) and TBDPSCl (138  $\mu$ L, 0.53 mmol). The solution was stirred at ambient temperature for 5 h, then was diluted with EtOAc and washed sequentially with KHSO<sub>4</sub> (1M), NaHCO<sub>3</sub> (sat), then brine. The organic layer was dried over MgSO<sub>4</sub>, filtered and concentrated to provide the crude product which was purified by HPLC (15% EtOAc in hexanes, 21 mm column, 10 mL/min.), affording the 282 mg of the pure ketone **3** (82%):  $[\alpha]_D^{23} +18.2^\circ$  (*c* 2.5, CHCl<sub>3</sub>); <sup>1</sup>H NMR (500 MHz, CDCl<sub>3</sub>)  $\delta$  7.62-7.58 (m, 4 H), 7.52-7.33 (m, 6 H), 6.90-6.89 (m, 2 H), 6.82-6.80 (m, 2 H), 4.12 (d, *J* = 2.2 Hz, 1 H), 3.83-3.79 (m, 4 H), 3.66-3.58 (m, 2 H), 3.50 (dd, *J* = 9.2, 9.2 Hz, 1 H), 3.41 (ddd, *J* = 9.5, 9.5, 2.0 Hz, 1 H), 3.31 (dd, *J* = 10.4, 2.1 Hz, 1 H), 2.03 (s, 3 H), 1.95-1.89 (m, 2 H), 1.48-1.45 (m, 1 H), 1.03 (s, 9 H), 1.00 (d, *J* = 6.6 Hz, 3 H), 0.97 (s, 9 H), 0.89 (t, *J* = 7.9 Hz, 9 H), 0.53 (q, *J* = 7.9 Hz, 6 H), 0.08 (s, 6 H); <sup>13</sup>C NMR (100 MHz, CDCl<sub>3</sub>)  $\delta$  211.5, 153.69, 153.66, 135.4, 133.93, 133.89, 129.5, 129.4, 127.6, 127.5, 116.9, 114.3, 82.8, 81.8, 78.7, 78.3, 75.9, 60.4, 55.6, 38.8, 35.2, 27.1, 26.8, 25.9, 19.2, 18.3, 13.5, 6.9, 5.2, -4.4, -4.8; IR (thin film) 3072, 2956, 2932, 2877, 2859, 1736, 1716, 1506, 1464, 1428, 1378, 1362, 1350, 1229, 1153, 1088, 1042, 1012 cm<sup>-1</sup>; HRMS (FAB) calcd for C<sub>46</sub>H<sub>72</sub>Si<sub>3</sub>O<sub>7</sub>Na, 843.4484 *m/z* (*M* + H)<sup>+</sup>; observed, 843.4454 *m/z*.

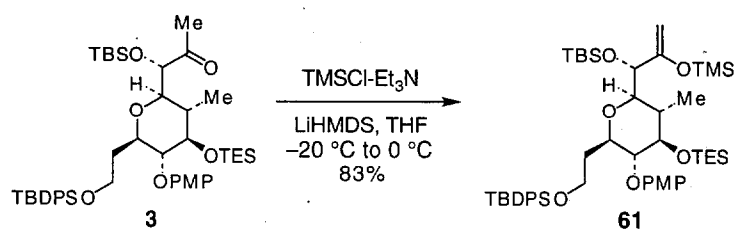

**1-(4-triethylsilyloxy-5-(4-methoxy-phenoxy)-6-(*tert*-butyldiphenyl-silyloxy-ethyl)-tetrahydro-pyran-2-yl)-1-(*tert*-butyl-dimethyl-silyloxy)-2-trimethylsilyloxy-prop-2-ene (61).** To a solution of the methyl ketone **3** (241 mg, 0.29 mmol) in 4 mL of THF cooled to -20 °C, was added 2 mL Et<sub>3</sub>N : TMSCl (1 : 1), followed by 2 mL of LiHMDS (1.0 M in THF).<sup>5</sup> The mixture was allowed to warm to 0 °C, and an addition 1 mL of Et<sub>3</sub>N : TMSCl (1 : 1) was added, followed by 0.5 mL of LiHMDS (1.0 M in THF). The reaction was then quenched with pH 7 buffer, diluted with hexanes and washed sequentially with pH 7 buffer and brine. The organic layers were dried over Na<sub>2</sub>SO<sub>4</sub>, filtered and concentrated to afford the crude enol silane **61**,

which was purified by HPLC (5% EtOAc in hexanes, 21 mm column, 10 mL/min.) affording 214 mg (83%) of the pure enol silane **3**:  $^1\text{H}$  NMR (500 MHz,  $\text{CDCl}_3$ )  $\delta$  7.61-7.58 (m, 4 H), 7.40-7.30 (m, 6 H), 6.87-6.85 (m, 2 H), 6.79-6.77 (m, 2 H), 4.31 (s, 1 H), 4.10 (s, 1 H), 3.95 (s, 1 H), 3.79-3.75 (m, 4 H), 3.73-3.70 (m, 2 H), 3.44 (dd,  $J = 9.2, 9.2$  Hz, 1 H), 3.33 (ddd,  $J = 9.4, 9.4, 2.1$  Hz, 1 H), 3.04 (dd,  $J = 10.4, 1.8$  Hz, 1 H), 1.00 (s, 9 H), 0.99 (d,  $J = 6.6$  Hz, 3 H), 0.92 (s, 9 H), 0.86 (t,  $J = 7.9$  Hz, 9 H), 0.50 (q,  $J = 8.0$  Hz, 6 H), 0.14 (s, 9 H), 0.05 (s, 3 H), 0.04 (s, 3 H);  $^{13}\text{C}$  NMR (100 MHz,  $\text{CDCl}_3$ )  $\delta$  157.4, 153.9, 153.6, 135.5, 134.2, 129.3, 127.5, 119.7, 116.9, 114.3, 90.8, 82.3, 80.8, 79.2, 75.6, 73.7, 60.9, 55.7, 39.5, 35.7, 26.9, 26.0, 19.2, 18.2, 13.7, 7.0, 5.3, 0.2, -4.3, -5.0; IR (thin film) 3072, 3050, 2957, 2932, 2878, 2858, 1643, 1591, 1506, 1472, 1464, 1428, 1377, 1362, 1305, 1253, 1230, 1156, 1111, 1088, 1044, 1009  $\text{cm}^{-1}$ ; HRMS (EI) calcd for  $\text{C}_{49}\text{H}_{80}\text{Si}_4\text{O}_7$ , 892.4981  $m/z$  ( $\text{M}^+$ ); observed, 892.4938  $m/z$ .

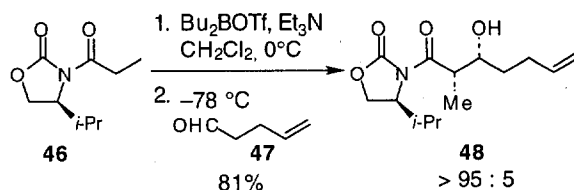

**[3(2'S, 3'R)4S]-3-[3'-Hydroxy-2'-methyl-6'-heptenoyl]-4-isopropyl-2-**

**oxazolidinone (48).**<sup>6</sup> To a 0 °C solution of N-propionyl oxazolidinone **46** (1.53 g, 8.24 mmol) in 18 mL of was added di-*n*-butylboron triflate (2.28 mL, 9.07 mmol) dropwise followed by  $\text{Et}_3\text{N}$  (1.37 mL, 9.89 mmol). The mixture was stirred for an additional 30 min. at 0 °C, then was cooled to -78 °C and neat 4-pentenal (0.76 g, 9.03 mmol) was added via syringe. The reaction was stirred for 30 min at -78 °C and then for 2 h at 0 °C. The mixture was diluted with  $\text{CH}_3\text{OH}$  (30 mL) and pH 7 phosphate buffer (10 mL), and stirred for 10 min at 0 °C. A solution of 30% aqueous  $\text{H}_2\text{O}_2$  (10 mL) was then added dropwise with vigorous stirring. After 1 h at 0 °C, the reaction mixture was diluted with brine and extracted with EtOAc (3x). The combined extracts were washed with  $\text{NaHCO}_3$  (sat), dried over  $\text{Na}_2\text{SO}_4$ , filtered and concentrated. Purification of the crude product by flash column chromatography on silica gel in hexane-EtOAc (gradient from 9: 1 to 3 : 1) provided 1.8 g (81%) of aldol **48** as a colorless oil:  $[\alpha]_{\text{D}}^{23} +66^\circ$  ( $c$  2.0,  $\text{CHCl}_3$ );  $^1\text{H}$  NMR (360 MHz,  $\text{CDCl}_3$ )  $\delta$  5.81 (app ddt,  $J = 18.0, 11.0, 7.0$  Hz, 1 H), 5.03 (app ddt,  $J = 18.0, 1.5, 1.5$  Hz, 1 H), 4.95 (app ddt,  $J = 11.0, 1.5, 1.5$  Hz, 1 H),



4.48-4.43 (m, 1 H), 4.27 (dd,  $J = 9.0, 9.0$  Hz, 1 H), 4.19 (dd,  $J = 9.5, 3.5$  Hz, 1 H), 3.97-3.92 (m, 1 H), 3.75 (qd,  $J = 7.2, 3.0$  Hz, 1 H), 3.0 (br s, 1 H), 2.38-2.28 (m, 1 H), 2.28-2.17 (m, 1 H), 2.17-2.05 (m, 1 H), 1.70-1.59 (m, 1 H), 1.51-1.41 (m, 1 H), 1.24 (d,  $J = 7.3$  Hz, 3 H), 0.91 (d,  $J = 7.0$  Hz, 3 H), 0.87 (d,  $J = 7.0$  Hz, 3 H);  $^{13}\text{C}$  NMR (100 MHz,  $\text{CDCl}_3$ )  $\delta$  177.83, 153.5, 138.1, 115.0, 70.5, 63.3, 58.2, 42.0, 32.8, 30.1, 28.3, 17.9, 14.6, 10.7; IR (thin film) 3522, 2967, 1780, 1694, 1386, 1301, 1204, 1121, 1056, 1016, 992  $\text{cm}^{-1}$ ; HRMS (CI,  $\text{NH}_3$ ) calcd for  $\text{C}_{14}\text{H}_{24}\text{NO}_4$ , 270.1705  $m/z$  ( $\text{M} + \text{H}^+$ ); observed, 270.1702  $m/z$ . Anal. Calcd for  $\text{C}_{14}\text{H}_{23}\text{NO}_4$ : C, 62.43; H, 8.61; N, 5.20. Found: C, 62.31; H, 8.26; N, 5.20.

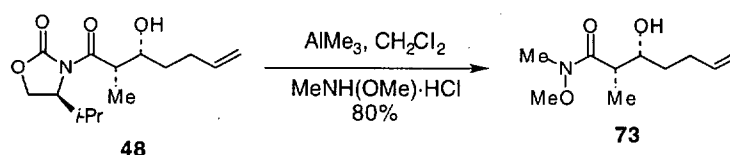

**(2S,3R)-N-methoxy-N,2-dimethyl-3-hydroxy-hept-6-ene-amide (73).**<sup>6</sup> To a stirred suspension of *N*, *O*-dimethylhydroxylamine hydrochloride (540 mg, 5.54 mmol) in 7.5 mL of  $\text{CH}_2\text{Cl}_2$  at  $-10^\circ\text{C}$  was slowly added a 2.0 M solution of  $\text{Me}_3\text{Al}$  in toluene (2.76 mL, 5.52 mmol). The reaction mixture was stirred at  $0^\circ\text{C}$  for 15 min until gas evolution ceased. The solution was recooled again to  $-10^\circ$  and a solution of aldol **48** (496 mg, 1.84 mmol) in  $\text{CH}_2\text{Cl}_2$  (7.5 mL) was added. The reaction mixture was stirred for 1 h at  $-10^\circ$  to  $-5^\circ\text{C}$ , then 2 h at  $0^\circ\text{C}$  and finally 0.5 h at ambient temperature and then poured into an ice-cold mixture of 0.5 N HCl (50 mL) and  $\text{CH}_2\text{Cl}_2$  (25 mL). After being stirred vigorously for 5 min, the mixture was extracted with  $\text{CH}_2\text{Cl}_2$  (3x). The combined extracts were washed with pH 7 buffer, dried over  $\text{Na}_2\text{SO}_4$ , filtered and concentrated to provide a crude product which was purified by silica gel chromatography in hexane-EtOAc (gradient from 6 : 4 to 7 : 3) to give 295 mg of the amide **73** as a pale yellow oil (80%):  $[\alpha]_{\text{D}}^{23} +13.2^\circ$  ( $c$  2.0,  $\text{CHCl}_3$ );  $^1\text{H}$  NMR (400 MHz,  $\text{CDCl}_3$ )  $\delta$  5.84 (app ddt,  $J = 17.9, 10.3, 6.7$  Hz, 1 H), 5.04 (app ddt,  $J = 18.0, 1.5, 1.5$  Hz, 1 H), 4.96 (app ddt,  $J = 11.0, 1.5, 1.5$  Hz, 1 H), 3.90-3.85 (m, 1 H), 3.78 (b s, 1 H), 3.70 (s, 3 H), 3.19 (s, 3 H), 2.91-2.84 (m, 1 H), 2.30-2.20 (m, 1 H), 2.17-2.06 (m, 1 H), 1.72-1.62 (m, 1 H), 1.47-1.38 (m, 1 H), 1.7 (d,  $J = 7$  Hz, 3 H);  $^{13}\text{C}$  NMR (100 MHz,  $\text{CDCl}_3$ )  $\delta$  179.3, 139.4, 115.9, 71.9, 62.6, 39.7, 34.1, 32.9, 31.3, 11.2; IR (thin film) 3436, 2976, 2939, 1652, 1450, 1386, 1179, 1099, 1040, 994  $\text{cm}^{-1}$ ; MS (CI,

NH<sub>3</sub>) calcd for C<sub>10</sub>H<sub>20</sub>NO<sub>3</sub>, 202.1 *m/z* (M + H)<sup>+</sup>; observed, 202.1 *m/z*. *Anal.* Calcd for C<sub>10</sub>H<sub>19</sub>NO<sub>3</sub>: C, 59.68; H, 9.52; N, 6.96. Found: C, 59.97; H, 9.52; N, 6.86.

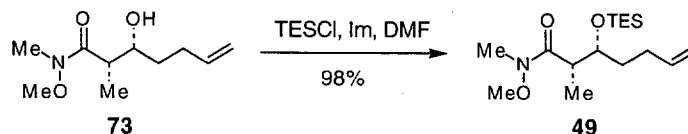

**(2*S*,3*R*)-N-methoxy-N,2-dimethyl-3-triethylsilyloxy-hept-6-ene-amide(49).**<sup>7</sup>

To a solution of amide **73** (413 mg, 2.05 mmol) and imidazole (586 mg, 8.61 mmol) in 2 mL of dimethylformamide was added TESCl (0.72 mL, 4.29 mmol) dropwise at ambient temperature. The reaction was stirred for 2.5 h at ambient temperature, then quenched with NaHCO<sub>3</sub> (sat). The solution was diluted with EtOAc and washed sequentially with NaHCO<sub>3</sub> (sat) and brine, dried over Na<sub>2</sub>SO<sub>4</sub>, filtered and concentrated. The crude material was purified by flash column chromatography and eluted with hexanes-EtOAc (gradient from 9: 1 to 8 : 2) affording 646 mg of the desired TES ether **49** (98%) as a pale yellow oil: [ $\alpha$ ]<sub>D</sub><sup>23</sup> +2.9° (*c* 4.6, CHCl<sub>3</sub>); <sup>1</sup>H NMR (400 MHz, CDCl<sub>3</sub>)  $\delta$  5.81 (app ddt, *J* = 17.9, 10.3, 6.6 Hz, 1 H), 5.00 (app ddt, *J* = 18.0, 1.5, 1.5 Hz, 1 H), 4.93 (app ddt, *J* = 11.0, 1.5, 1.5 Hz, 1 H), 3.95 (dt, *J* = 8.4, 4.8 Hz, 1 H), 3.69 (s, 3 H), 3.18 (s, 3 H), 3.10-2.94 (m, 1 H), 2.16-2.08 (m, 2 H), 1.62-1.48 (m, 2 H), 1.18 (d, *J* = 7.0 Hz, 3 H), 0.98 (t, *J* = 8 Hz, 9 H), 0.64 (q, *J* = 8 Hz, 6 H); <sup>13</sup>C NMR (100 MHz, CDCl<sub>3</sub>)  $\delta$  176.5, 138.8, 114.2, 73.6, 61.4, 41.0, 35.2, 32.1, 28.9, 14.7, 7.0, 5.2; IR (thin film) 2955, 2877, 1668, 1456, 1416, 1384, 1239, 1110, 1054, 1000 cm<sup>-1</sup>; HRMS (CI, NH<sub>3</sub>) calcd for C<sub>16</sub>H<sub>34</sub>NO<sub>3</sub>Si 316.2308 *m/z* (M + H)<sup>+</sup>; observed, 316.2299 *m/z*. *Anal.* Calcd for C<sub>16</sub>H<sub>33</sub>NO<sub>3</sub>Si: C, 60.91; H, 10.54; N, 4.44. Found: C, 60.98; H, 10.59; N, 4.35.

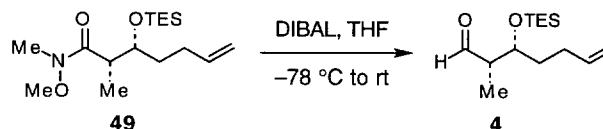

**(2*S*, 3*R*)-2-methyl-3-triethylsilyloxy-6-heptenal (4).**<sup>7</sup> To a -50 °C solution of amide **49** (45 mg, 0.14 mmol) in 1 mL THF was added 400  $\mu$ L DIBAL (1 M in hexanes). The solution was stirred under N<sub>2</sub> for 20 minutes (-50 °C to -20 °C). The reaction was diluted with 500  $\mu$ L CH<sub>3</sub>OH, then 1 mL of a saturated solution of Rochelle's salt was added. The solution was stirred at ambient temperature until the aluminum salts dissolved (c.a. 1 h). The solution was diluted with EtOAc and

washed with  $\text{NaHCO}_3(\text{sat})$  and brine. The organic layer was dried over  $\text{MgSO}_4$ , filtered and concentrated to afford the aldehyde (**4**) as a light yellow oil which was used without purification in the aldol reaction with enolsilane **61**.

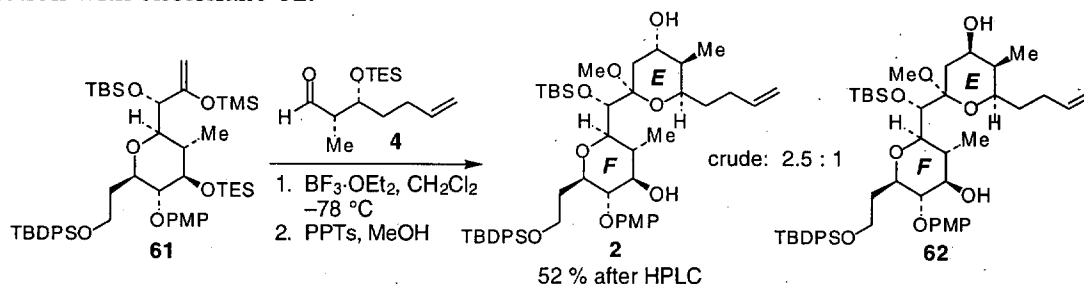

(2*R*, 3*S*, 4*R*, 5*R*, 6*R*)-2-(*tert*-butyldiphenylsilanyloxy-ethyl)-6-[(1'*S*)[(4''*S*, 2''*R*, 5''*R*)-2''-methoxy-4''-hydroxy-5''-methyl-6''-(3-butenyl)tetrahydro-2*H*-pyran-2-yl]-1'-*tert*-butyldimethyl-silanyloxy-methyl]-3-(methoxy-phenoxy)-5-methyl-tetrahydro-2*H*-pyran-4-ol (**2**) and (2*R*, 3*S*, 4*R*, 5*R*, 6*R*)-2-(*tert*-butyldiphenyl-silanyloxy-ethyl)-6-[(1'*S*)[(4''*R*, 2''*R*, 5''*R*)-2''-methoxy-4''-hydroxy-5''-methyl-6''-(3-butenyl)tetrahydro-2*H*-pyran-2-yl]-1'-*tert*-butyldimethyl-silanyloxy-methyl]-3-(methoxy-phenoxy)-5-methyl-tetrahydro-2*H*-pyran-4-ol (**62**) The aldehyde **4** (0.14 mmol) was concentrated in a 0.5 mL conical vial via the aid of a stream of  $\text{N}_2$ . To the crude yellow oil was added freshly activated 4Å molecular sieves, and then the enol silane **61** (44 mg, 0.049 mmol) was added as a solution in 250  $\mu\text{L}$  of  $\text{CH}_2\text{Cl}_2$ . The mixture was stirred at ambient temperature for 5 min, then cooled to  $-78^\circ\text{C}$ . To the cold solution, was added  $\text{BF}_3\cdot\text{OEt}_2$  (32  $\mu\text{L}$ , 0.25 mmol) - care was taken to ensure that the  $\text{BF}_3\cdot\text{OEt}_2$  was added to the side of the flask to allow for cooling of the Lewis acid prior to entering the reaction medium. The solution was stirred for 4.5 h at  $-78^\circ\text{C}$ , then warmed to  $-20^\circ\text{C}$  over 2 h. The reaction was quenched by the addition of 200  $\mu\text{L}$   $\text{Et}_3\text{N}$ . The solution was diluted with  $\text{EtOAc}$  and washed sequentially with brine,  $\text{KHSO}_4$  (1*M*) (2*x*),  $\text{NaHCO}_3$  (sat), then brine. The organic phase was dried over  $\text{Na}_2\text{SO}_4$ , filtered and concentrated to provide an oil which was diluted with 1.5 mL  $\text{CH}_2\text{Cl}_2$  and 2.0 mL of  $\text{CH}_3\text{OH}$ . To this solution was added PPTS (57 mg). The solution was stirred at ambient temperature for 2 h, then quenched with 2 mL of  $\text{NaHCO}_3$  (sat). The solution was diluted with  $\text{EtOAc}$  and washed with  $\text{NaHCO}_3$  (sat), then brine. The organic phase was dried over  $\text{MgSO}_4$ , filtered and concentrated to provide a crude mixture of **2** and **62** (2.5 : 1 by  $^1\text{H}$  NMR analysis). After

purification by HPLC (25% EtOAc in hexanes, 21 mm column Dynamax 60A, 10 mL/min), 22.2 mg (53 %) of the E-F bis-pyran subunit **2** was obtained.

**Data for 2:**  $[\alpha]_D^{23} +44.2^\circ$  (*c* 0.59, CHCl<sub>3</sub>); <sup>1</sup>H NMR (500 MHz, CDCl<sub>3</sub>)  $\delta$  7.64-7.59 (m, 4 H), 7.41-7.32 (m, 10 H), 6.95-6.92 (m, 2 H), 6.83-6.80 (m, 2 H), 5.89-5.81 (m, 1 H), 5.06-5.02 (m, 1 H), 4.99 (m, 1 H), 3.95 (m, 1 H), 3.81-3.72 (m, 7 H), 3.68 (dd, *J* = 9.0, 9.0 Hz, 1 H), 3.52-3.48 (m, 2 H), 3.4 (ddd, *J* = 9.5, 9.5, 2.5 Hz, 1 H), 3.23 (d, *J* = 10.5 Hz, 1 H), 3.17 (s, 3 H), 2.32-2.25 (m, 2 H), 2.13-2.06 (m, 1 H), 2.04-1.97 (m, 2 H), 1.87-1.79 (m, 1 H), 1.76-1.68 (m, 1 H), 1.66-1.53 (m, 4 H), 1.46-1.33 (m, 1 H), 1.05 (d, *J* = 6.3 Hz, 3 H), 1.03 (s, 9 H), 0.87 (s, 9 H), 0.80 (d, *J* = 7.3 Hz, 3 H), 0.09 (s, 3 H), 0.07 (s, 3 H); <sup>13</sup>C NMR (125 MHz, CDCl<sub>3</sub>)  $\delta$  154.3, 153.7, 138.5, 135.45, 135.43, 134.00, 133.98, 129.5, 127.6, 127.5, 117.6, 114.71, 114.68, 102.8, 83.4, 78.2, 78.1, 74.6, 70.4, 70.1, 67.0, 60.9, 55.7, 47.1, 38.2, 37.5, 35.5, 31.8, 30.3, 28.7, 26.9, 26.0, 19.2, 18.4, 13.7, 10.6, -3.1, -4.7; IR (thin film) 3412, 3072, 3049, 2955, 2930, 2857, 1641, 1590, 1506, 1472, 1463, 1442, 1428, 1376, 1362, 1309, 1229, 1178, 1156, 1106, 1087, 1064, 1029, 1001 cm<sup>-1</sup>; HRMS (FAB) calcd for C<sub>49</sub>H<sub>74</sub>Si<sub>2</sub>O<sub>9</sub>Na, 885.4769 *m/z* (*M* + Na)<sup>+</sup>; observed, 885.4791 *m/z*. The stereochemistry of **2** was assigned by <sup>1</sup>H nOe's as summarized below:

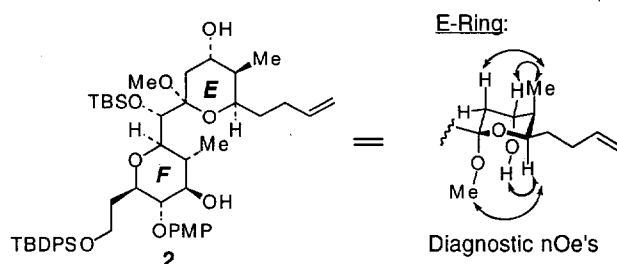

**Data for 62:**  $[\alpha]_D^{23} +26.2^\circ$  (*c* 0.5, CHCl<sub>3</sub>); <sup>1</sup>H NMR (500 MHz, CDCl<sub>3</sub>)  $\delta$  7.67-7.60 (m, 4 H), 7.41-7.33 (m, 6 H), 6.95-6.93 (m, 2 H), 6.83-6.81 (m, 2 H), 5.87-5.79 (m, 1 H), 5.05-5.00 (m, 1 H), 4.98-4.96 (m, 1 H), 3.89-3.83 (m, 1 H), 3.79-3.71 (m, 6 H), 3.68 (dd, *J* = 8.9, 8.9 Hz, 1 H), 3.53-3.42 (m, 3 H), 3.25 (d, *J* = 10.5 Hz, 1 H), 3.10 (s, 3 H), 2.27 (d, *J* = 2.9 Hz, 1 H), 2.26-2.22 (m, 1 H), 2.10-1.97 (m, 2 H), 1.86-1.81 (m, 1 H), 1.77-1.68 (m, 3 H), 1.60-1.52 (m, 5 H), 1.46-1.41 (m, 1 H), 1.05 (d, *J* = 6.6 Hz, 3 H), 1.02 (s, 9 H), 0.91 (s, 9 H), 0.75 (d, *J* = 7.1 Hz, 3 H), 0.53 (d, *J* = 6.3 Hz, 1 H), 0.09 (s, 3 H), 0.07 (s, 3 H); <sup>13</sup>C NMR (125 MHz, CDCl<sub>3</sub>)  $\delta$  154.3, 153.8, 138.5, 135.5, 134.0, 129.6, 129.5, 127.6, 117.5, 114.71, 114.66, 102.0, 83.5, 78.2, 78.1, 77.2, 74.6, 71.7, 70.0, 67.7, 60.9, 55.7, 47.2, 38.2, 37.3, 35.6, 32.2, 31.8, 30.4, 26.9, 26.1, 19.1, 18.4,

13.7, 4.3, -3.1, -4.6; IR (thin film) 3460, 3073, 2930, 2857, 1642, 1590, 1506, 1472, 1464, 1442, 1428, 1374, 1306, 1229, 1111, 1038, 1006  $\text{cm}^{-1}$ ; HRMS (FAB) calcd for  $\text{C}_{49}\text{H}_{74}\text{Si}_2\text{O}_9\text{Na}$  885.4769 $m/z$  ( $\text{M} + \text{Na}$ )<sup>+</sup>; observed, 885.4770 $m/z$ . The stereochemistry of **62** was assigned by  $^1\text{H}$  nOe's as summarized below.

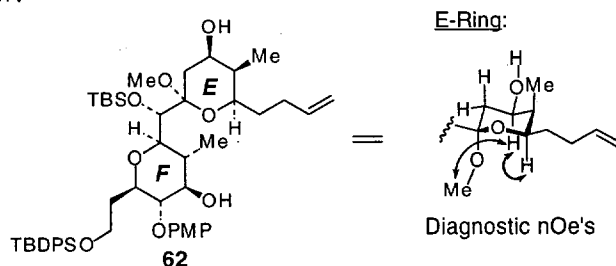

### References for Experimental Section

- 1) Taylor, R. E.; Ciavarri, J. P.; Hearn, B. P. *Tetrahedron Lett.* **1998**, 39, 9361.
- 2) Horita, K.; Yoshioka, T.; Tanaka, T.; Oikawa, Y.; Yonemitsu, O. *Tetrahedron* **1986**, 42, 3021.
- 3) Kolb, H. C.; VanNieuwenhze, M. S.; Sharpless, K. B. *Chem. Rev.* **1994**, 94, 2483.
- 4) VanRheenen, V.; Kelly, R. C.; Cha, D. Y. *Tetrahedron Lett.* **1976**, 1973.
- 5) Paterson, I.; Watson, C.; Yeung, K.-S.; Wallace, P. A.; Ward, R. A. *J. Org. Chem.* **1997**, 62, 452.
- 6) Evans, D. A.; Black, W. C. *J. Am. Chem. Soc.* **1993**, 115, 4497.
- 7) Evans, D. A.; Trotter, W.; Coleman, P. J.; Côté, B.; Dias, L. C.; Rajapakse, H. A.; Tyler, A. N. *Tetrahedron* **1999**, 55, 8671.

S30

f-f bis-pyran 2

Pulse Sequence: s2pul

Solvent: CDCl<sub>3</sub>

Ambient temperature

File: gcm-4-100-a

INOVA-500 "N1.Chem.LSA.UMich.Edu"

PULSE SEQUENCE

Relax. delay 1.000 sec

Pulse 40.0 degrees

Acq. time 2.500 sec

Width 8000.0 Hz

8 repetitions

OBSERVE H1, 499.9042507 MHz

DATA PROCESSING

F1 size 65536

Total time 0 min, 28 sec

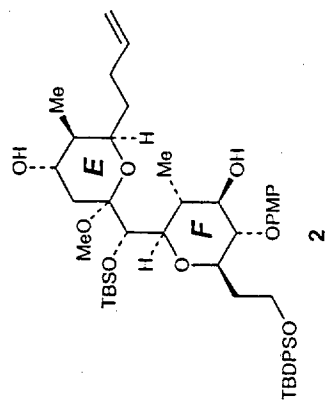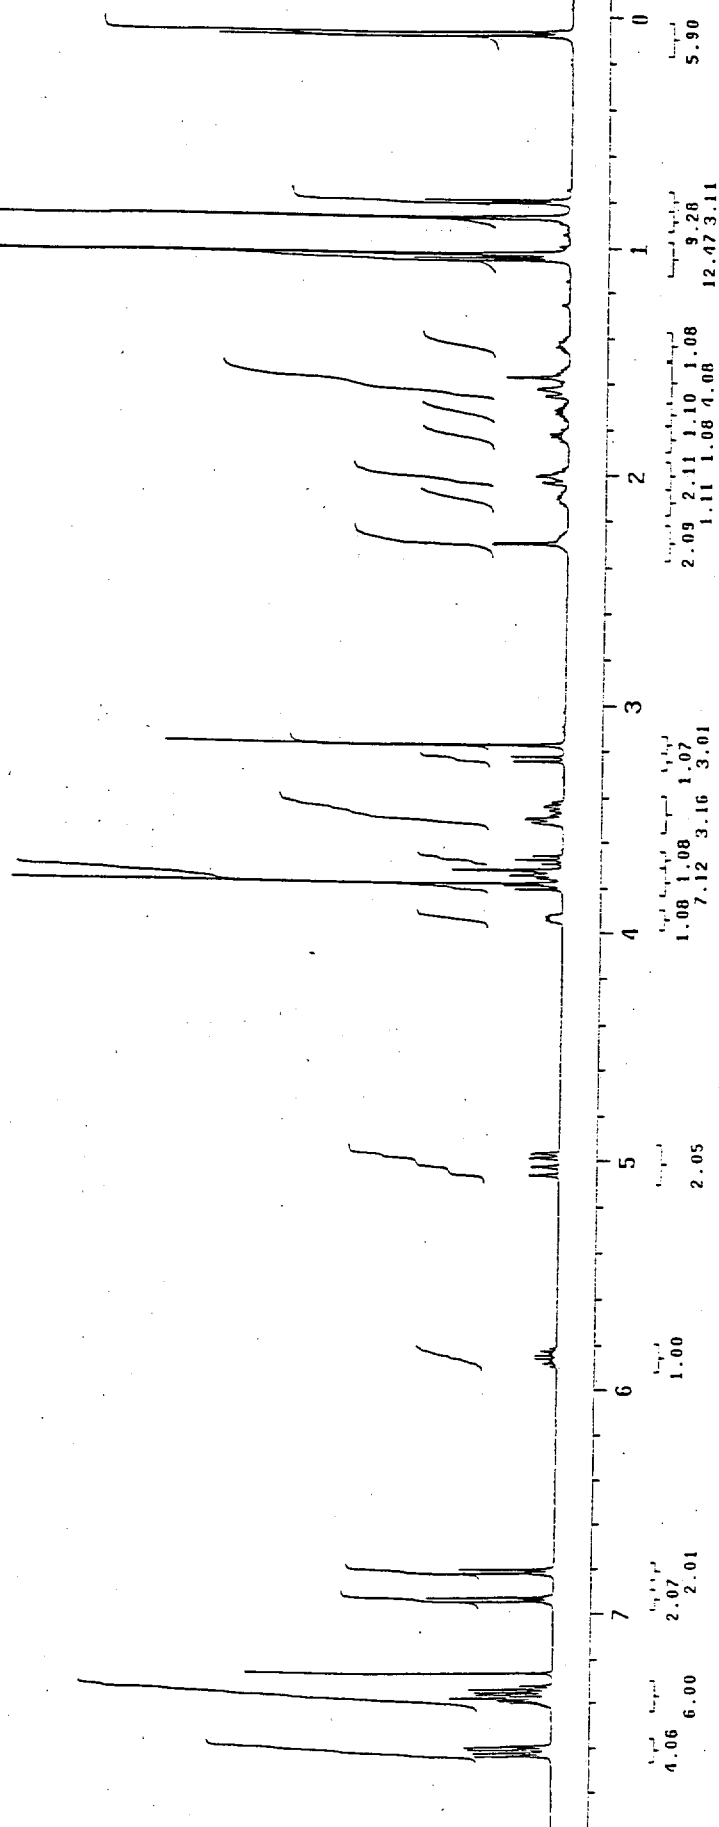

methyl ketone 3

Pulse Sequence: s2pul  
 Solvent: CDCl<sub>3</sub>  
 Ambient Temperature  
 File: gcm-4-23-hplc  
 INOVA-500 "RI.Chem.LSA.UMich.Edu"  
 PULSE SEQUENCE  
 Relax delay 1.000 sec  
 Pulse 40.2 degrees  
 Acq. time 2.500 sec  
 Width 8000.0 Hz  
 8 repetitions  
 OBSERVE H1, 499.9042605 MHz  
 DATA PROCESSING  
 FT size 65536  
 Total time 0 min, 28 sec

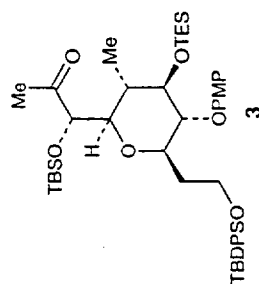

S31

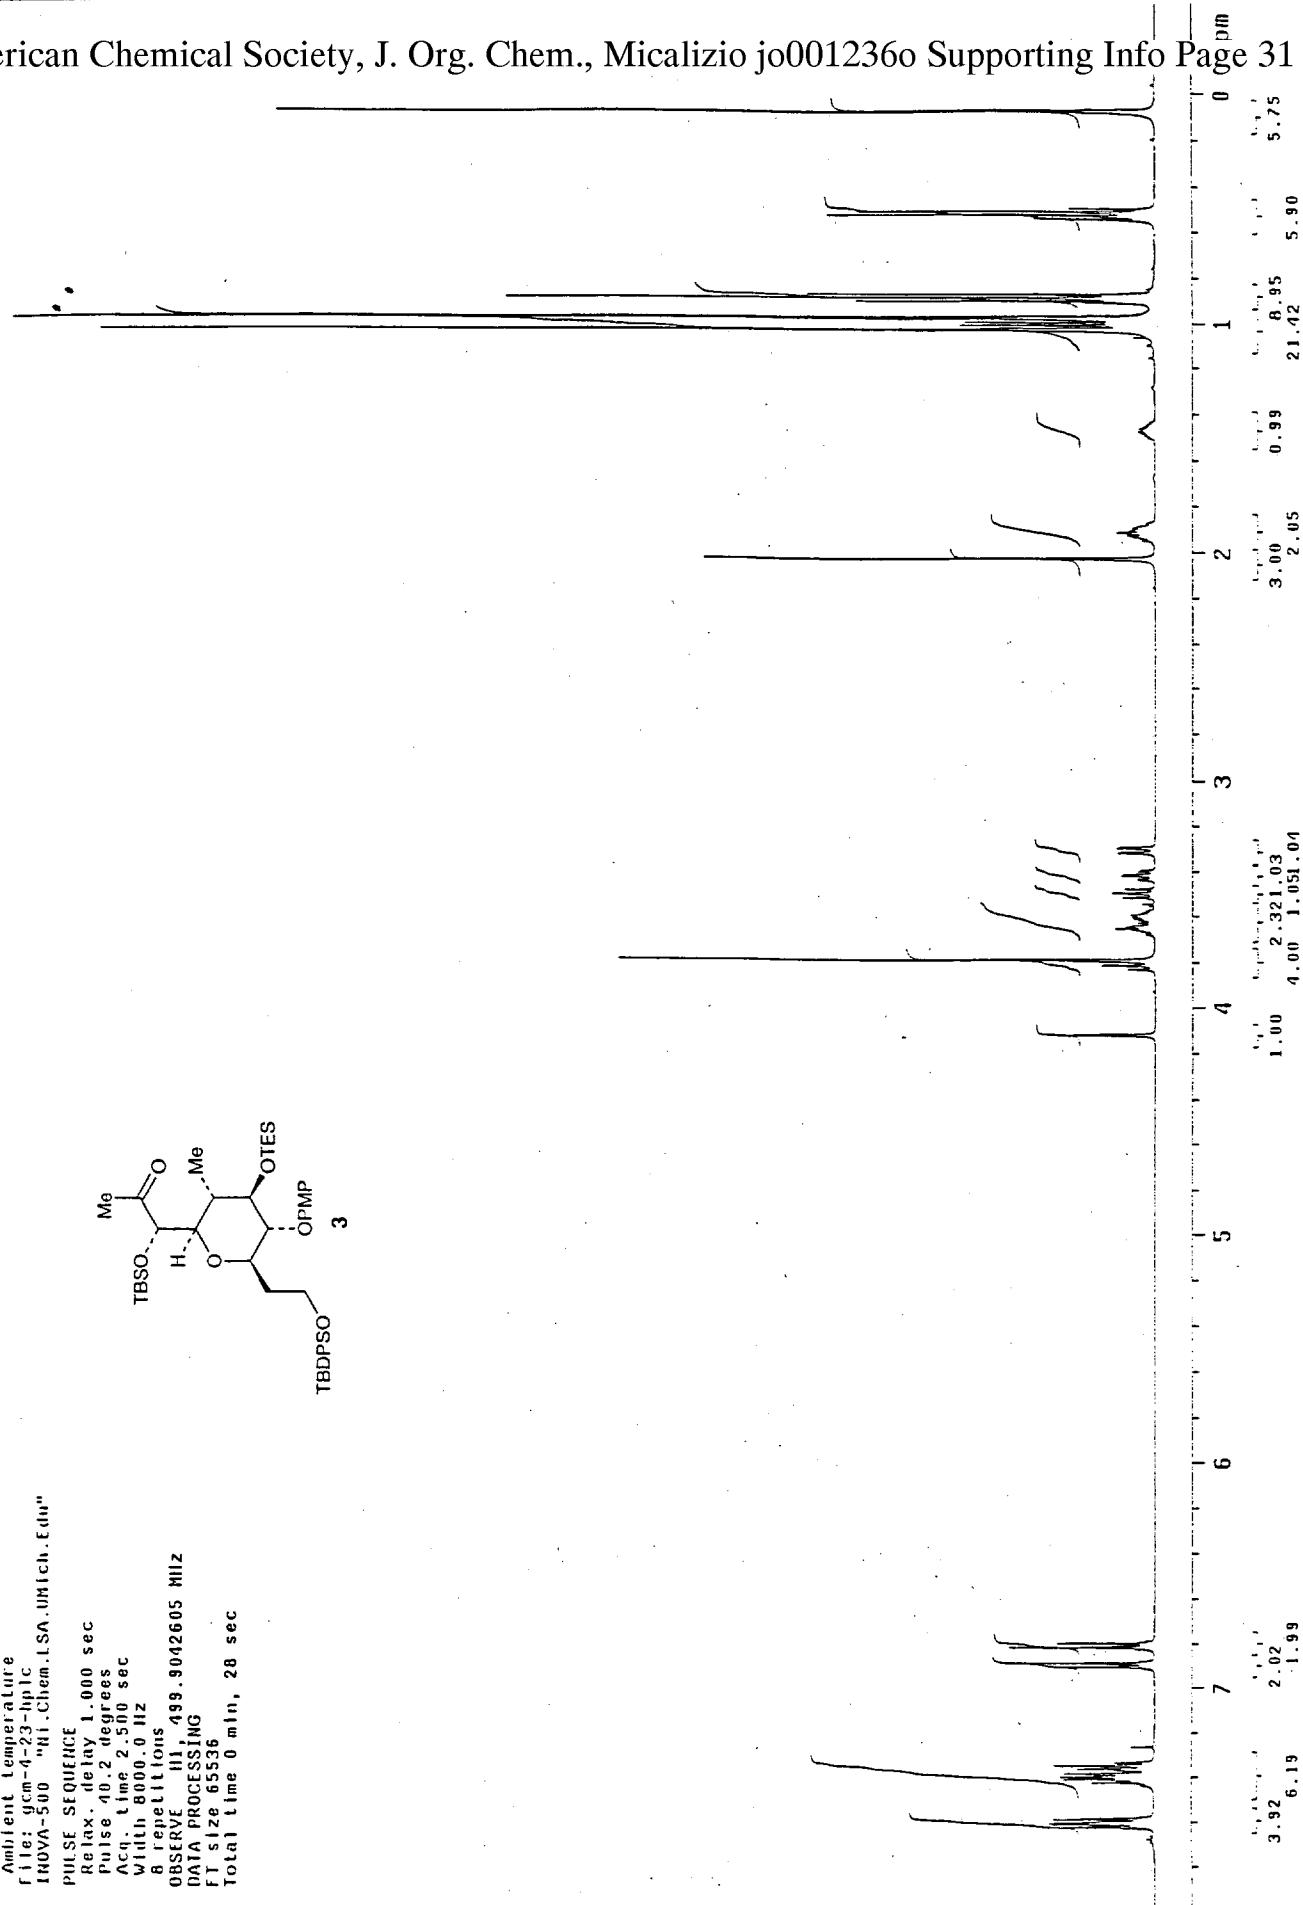

32

g-alkoxyallylstannane 17  
 Pulse Sequence: s2pul  
 Solvent: CHCl<sub>3</sub>  
 Ambient temperature  
 file: gcm-joc17  
 INOVA-500 "H1.Chem.LSA.UH1ch.Edu"

PULSE SEQUENCE  
 Relax. delay 1.000 sec  
 Pulse 40.0 degrees  
 Acq. time 2.500 sec  
 Width 8000.0 Hz  
 8 repetitions  
 OBSERVE H1 499.9042608 MHz  
 DATA PROCESSING  
 FI size 65536  
 Total time 0 min, 28 sec

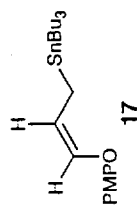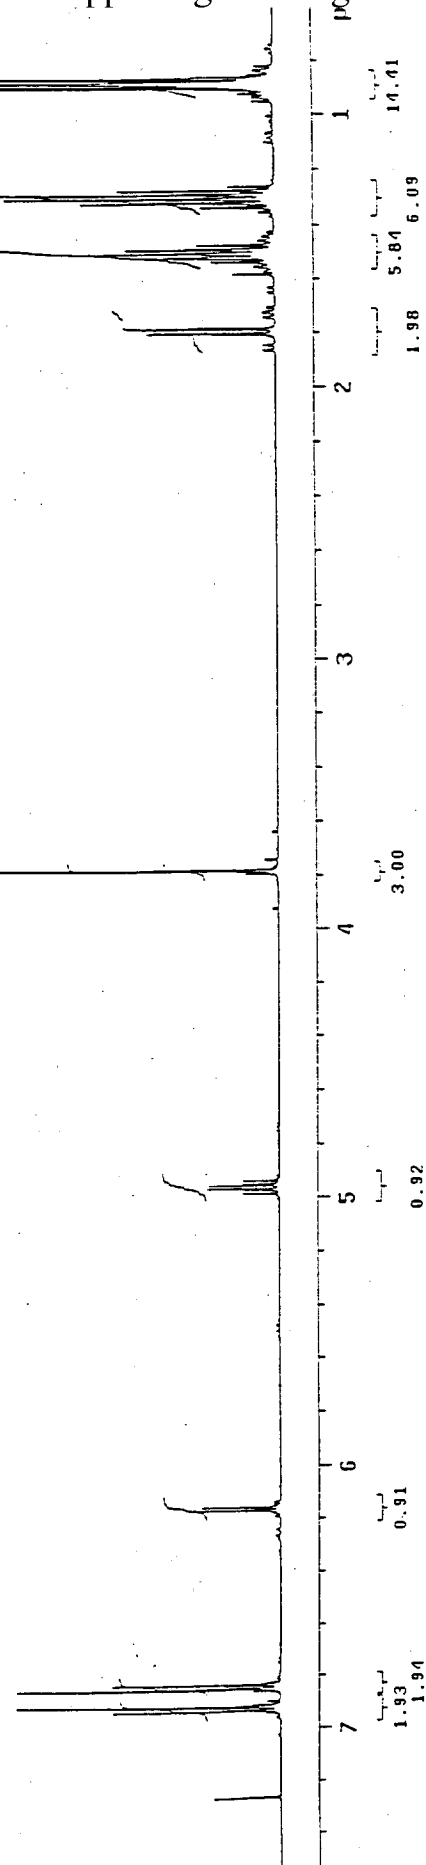



S33

g-alkoxyallylstannane 19  
 Pulse Sequence: s2pul  
 Solvent: CDCl3  
 Ambient temperature  
 File: gcm-Joc19  
 INOVA-500 "N1.Chem.LSA.UNI.ch.f1u"  
 PULSE SEQUENCE  
 Relax. delay 1.000 sec  
 Pulse 40.0 degrees  
 Acq. time 2.500 sec  
 Width 8000.0 Hz  
 8 repetitions  
 OBSERVE H1 499.9042610 MHz  
 DATA PROCESSING  
 F1 size 65536  
 Total time 0 min, 28 sec

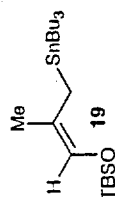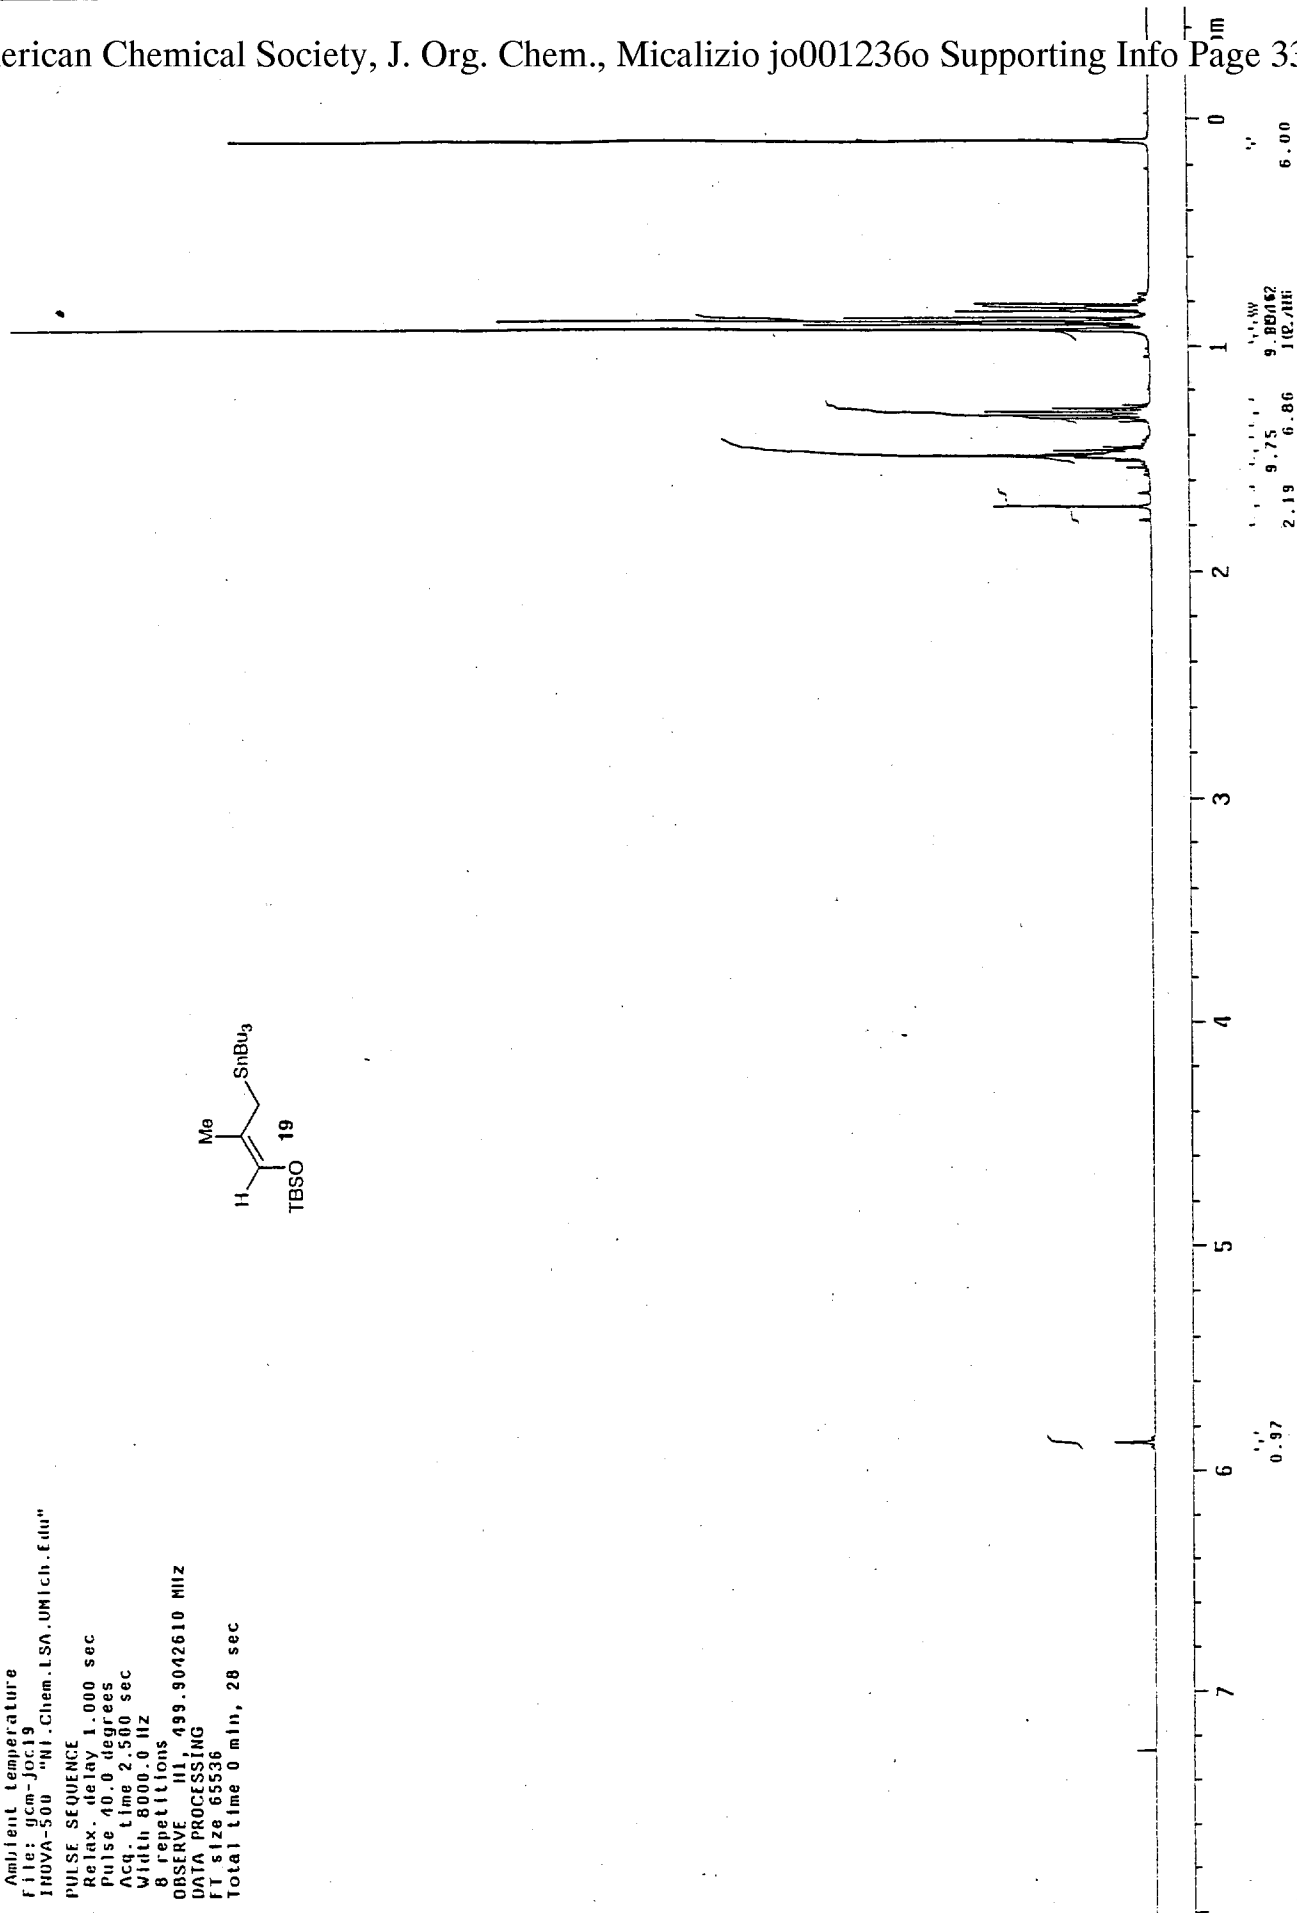

Spectrometer: I-500  
Nucleus: H1

31

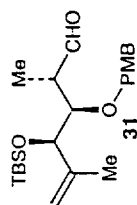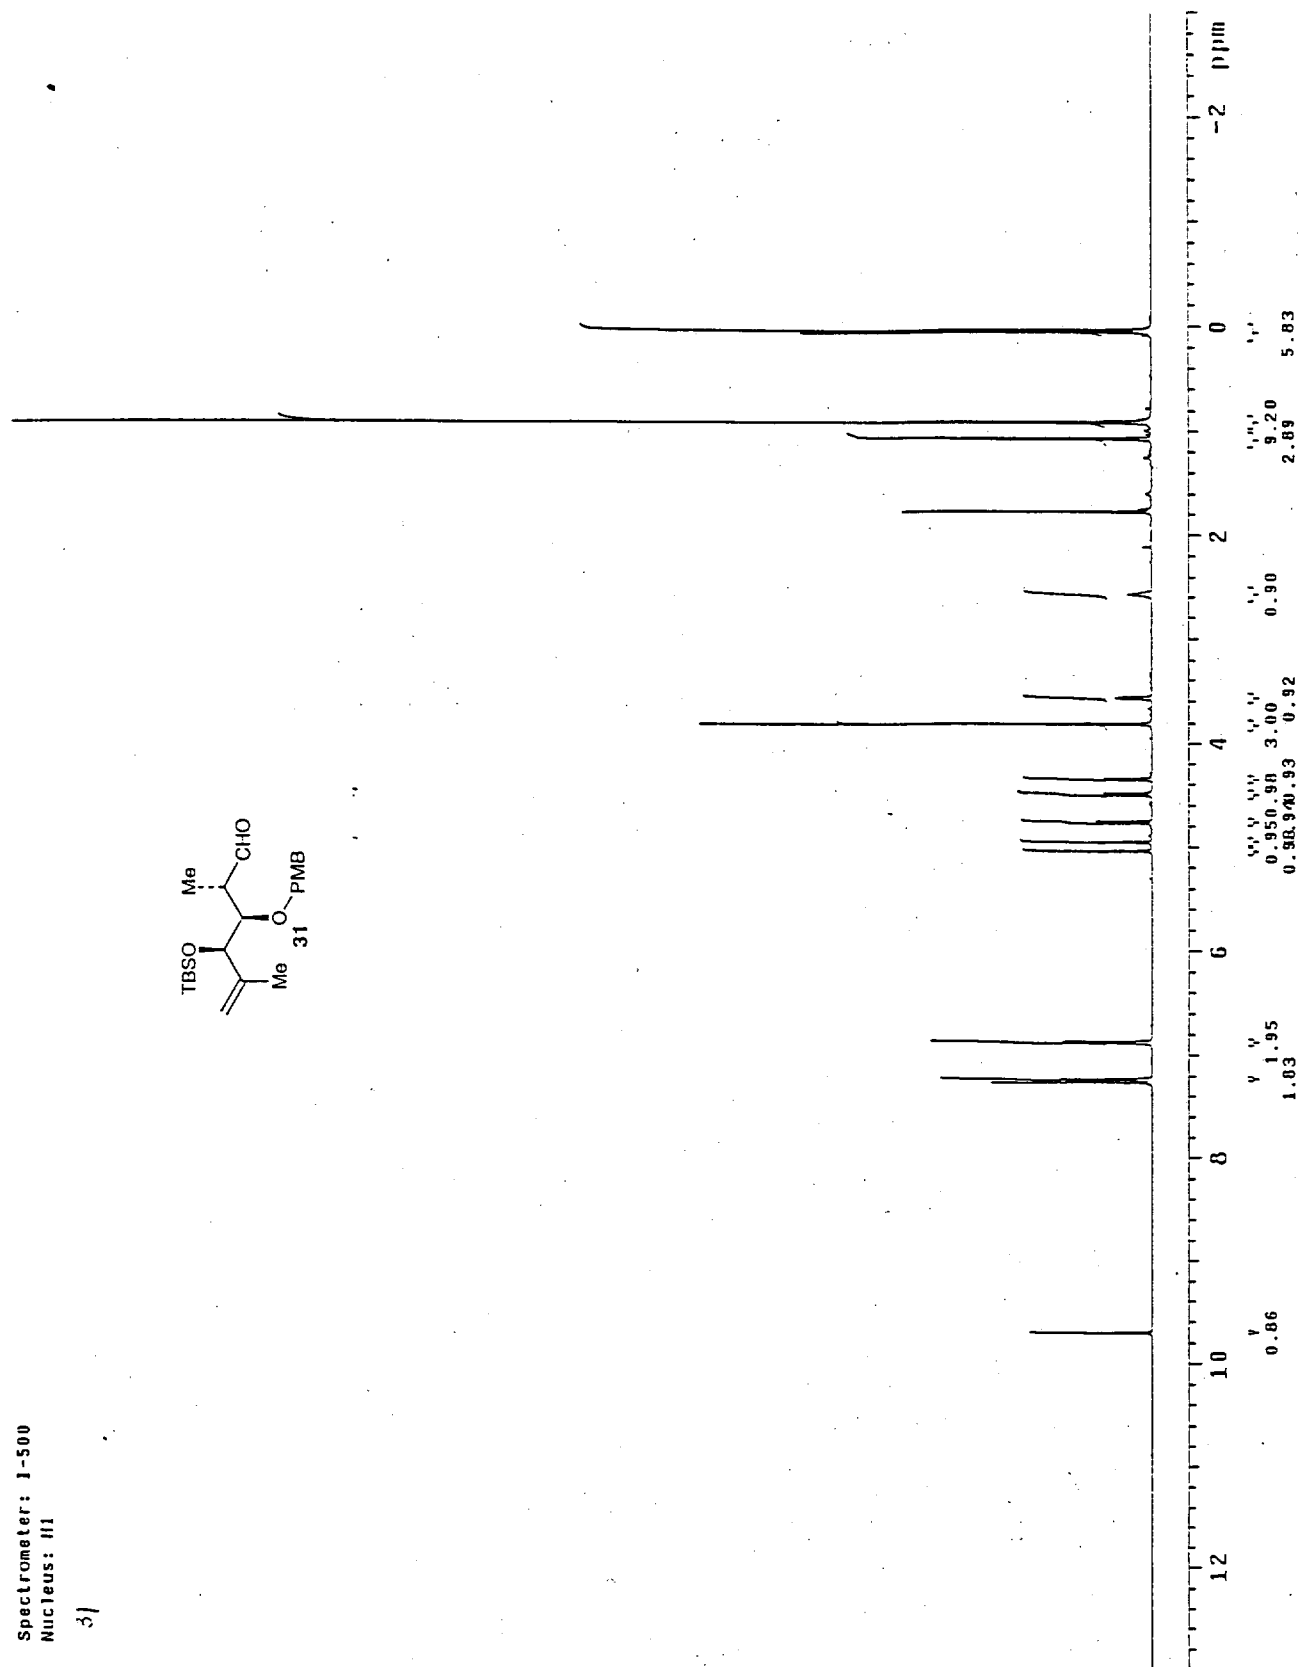

S35

aldehyde 38

Pulse Sequence: s2pul

Solvent: CDCl<sub>3</sub>

Ambient Temperature

File: gcm-2-208

INOVA-500 "N1.Chem.USA.UMich.Edu"

PULSE SEQUENCE

Relax. delay 1.000 sec

Pulse 33.2 degrees

Acq. time 2.500 sec

Width 8000.0 Hz

8 repetitions

OBSERVE N1, 499.9042600 MHz

DATA PROCESSING

F1 size 65536

Total time 0 min, 28 sec

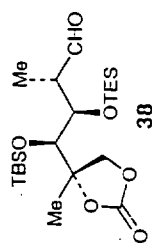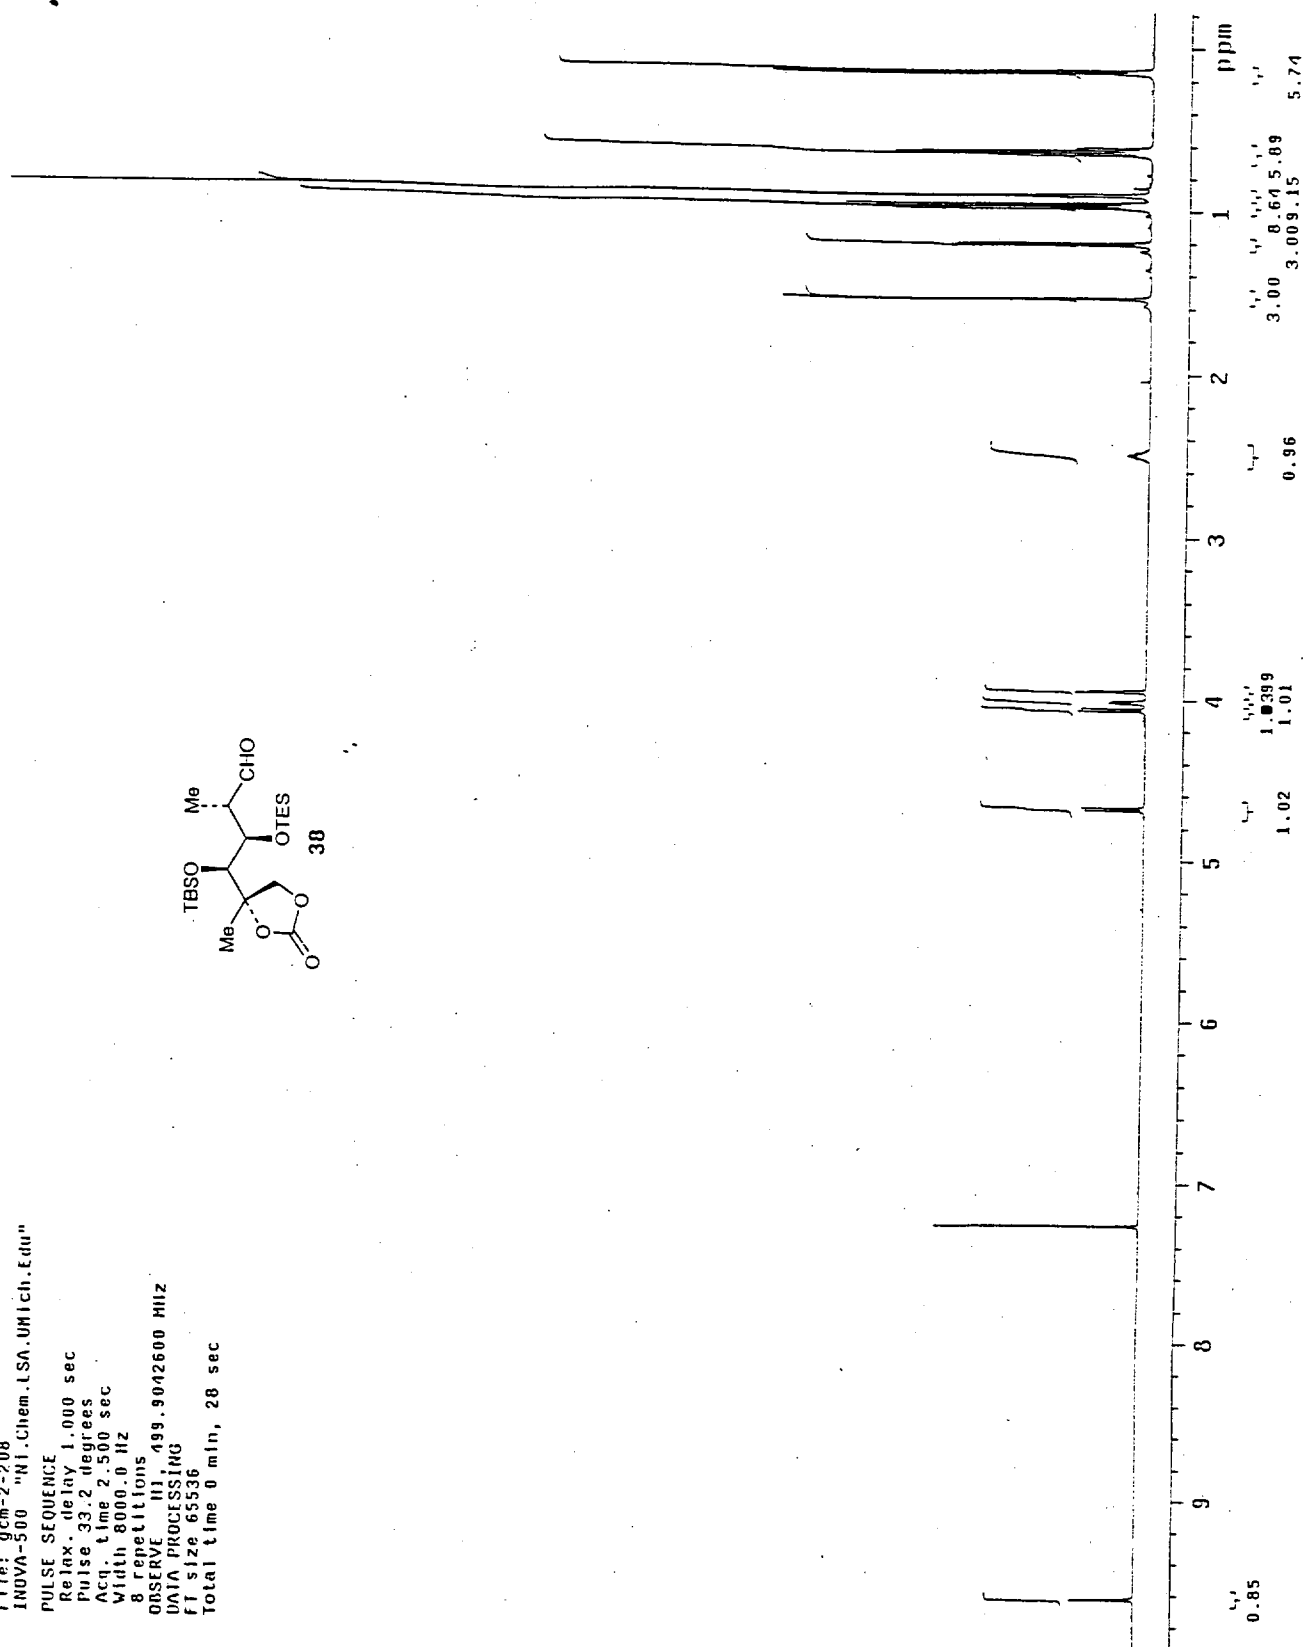

```

Pulse Sequence: s2pul
Solvent: CHCl3
Ambient temperature
file: gcm-2-209
INOVA-500 "N1.Chem.LSA.UNICL.Edu"

PULSE SEQUENCE
Relax. delay 1.000 sec
Pulse 33.2 degrees
Acq. time 2.500 sec
Width 8000.0 Hz
8 repetitions
OBSERVE H1, 499.9042600 MHz
DATA PROCESSING
FFT size 65536
Total time 0 min, 28 sec

```

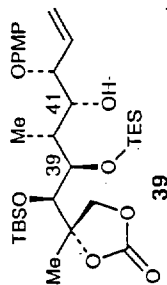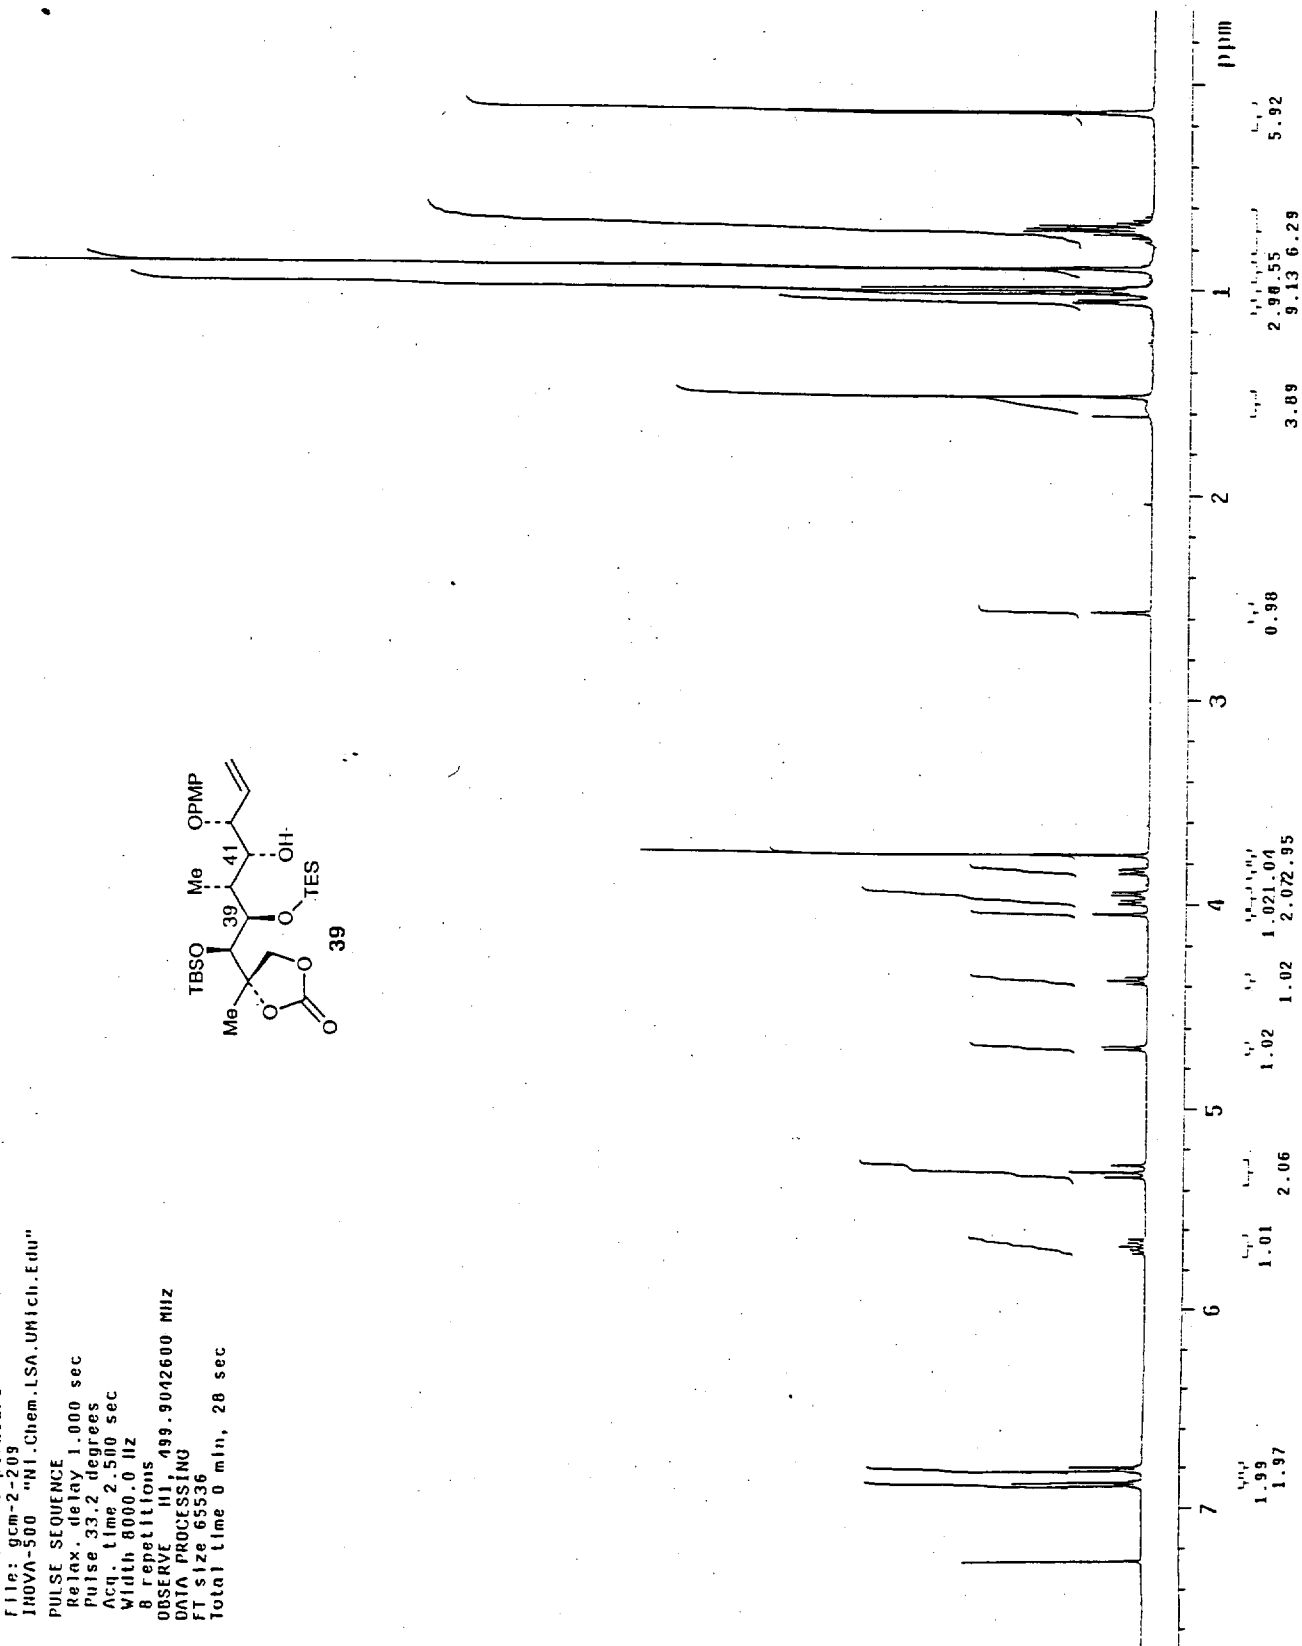

S37

pyran 40

Pulse Sequence: s2pul  
 Solvent: CHCl<sub>3</sub>  
 Ambient temperature  
 file: gcm-2-220-hplc  
 INOVA-500 "N1.Chem.LSA.UMich.Edu"

PULSE SEQUENCE  
 Relax. delay 1.000 sec  
 Pulse 39.0 degrees  
 Acq. time 2.500 sec  
 Width 8000.0 Hz  
 8 repetitions  
 OBSERVE H1 499.9042605 MHz  
 DATA PROCESSING  
 Ff size 65536  
 Total time 0 min, 28 sec

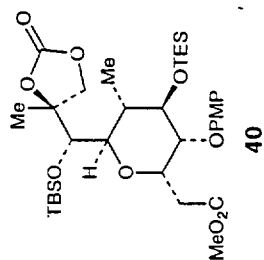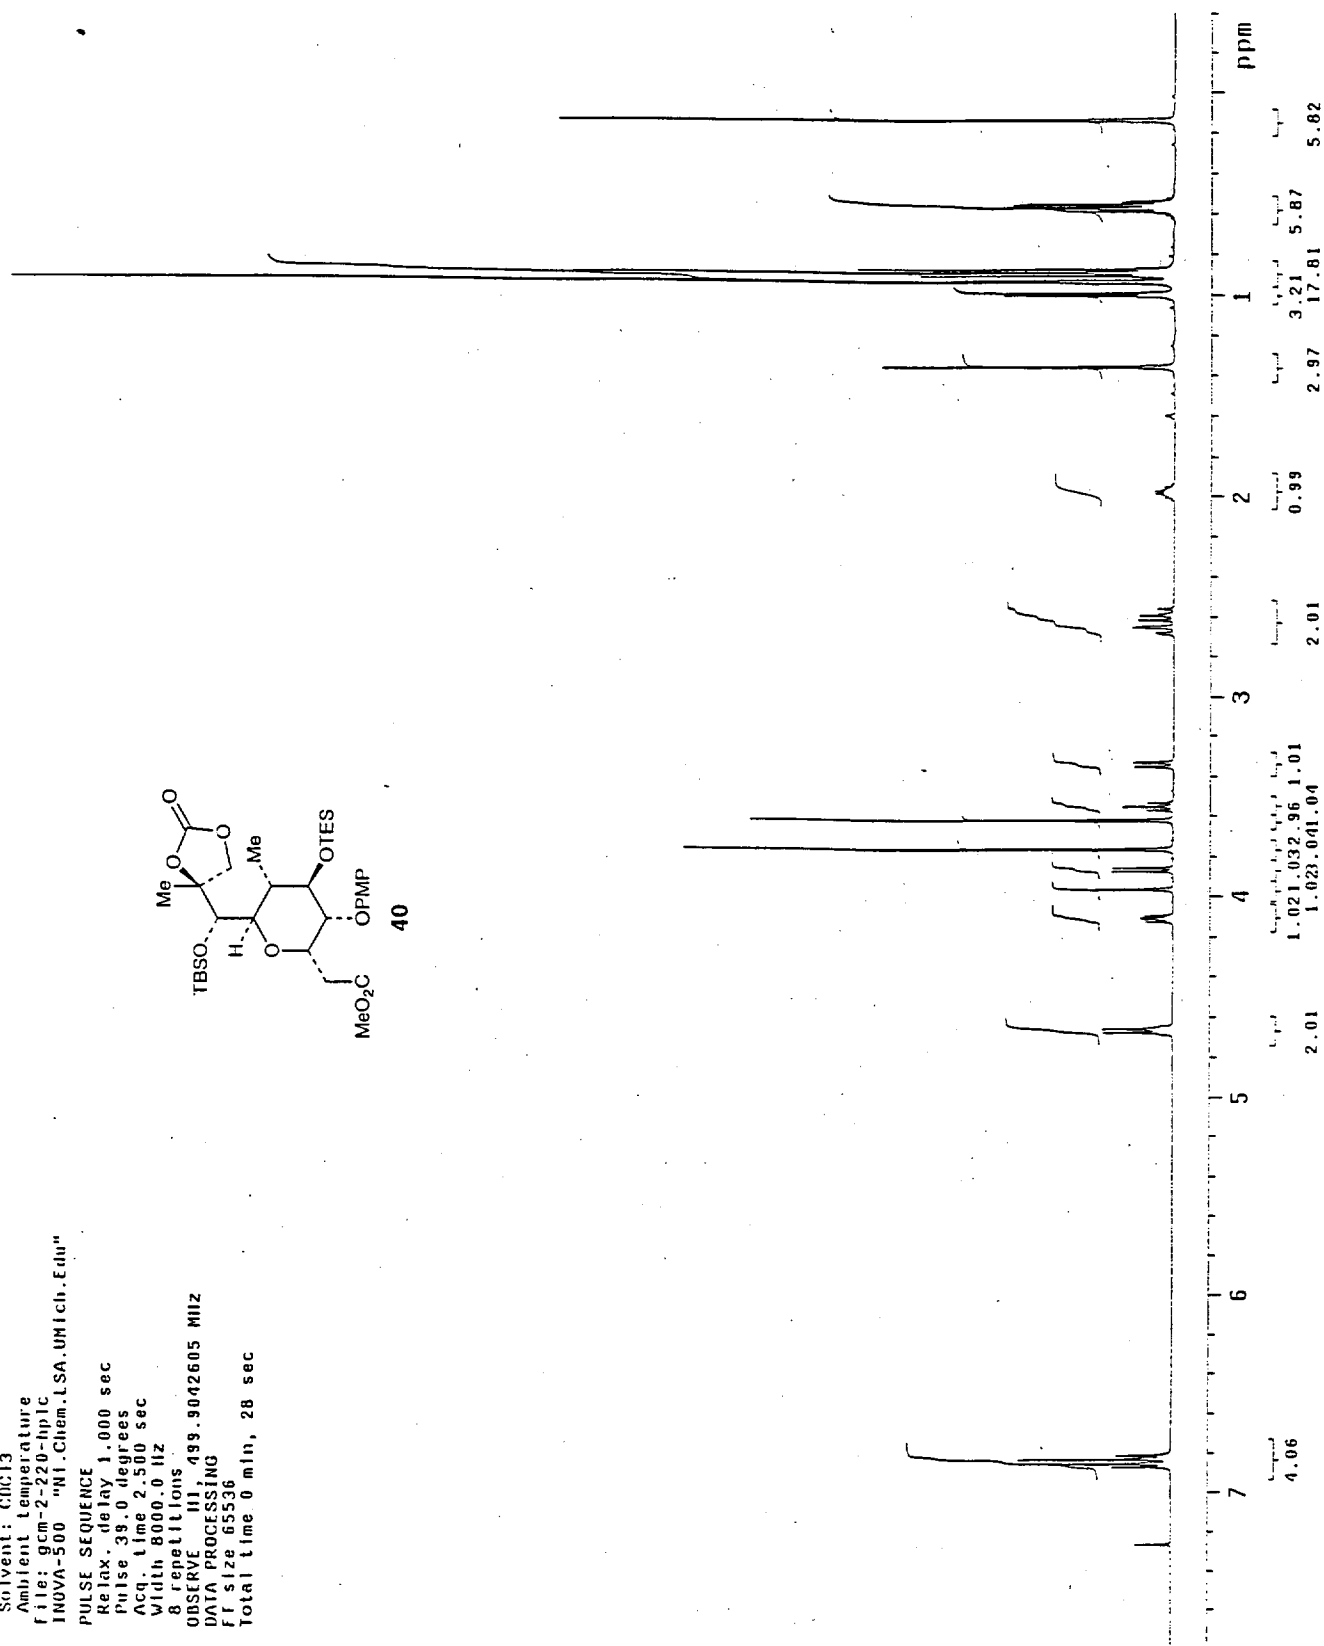

S38

pyran 41

Pulse Sequence: s2pul  
 Solvent: CDCl<sub>3</sub>  
 Ambient temperature  
 File: gcm-3-97  
 INOVA-500 "Nl.Chem.LSA.UMich.Edu"

PULSE SEQUENCE  
 Relax. delay 1.000 sec  
 Pulse 33.2 degrees  
 Acq. time 2.500 sec  
 Width 8000.0 Hz  
 8 repetitions  
 OBSERVE H1, 499.9042612 MHz  
 DATA PROCESSING  
 FT size 65536  
 Total time 0 min, 28 sec

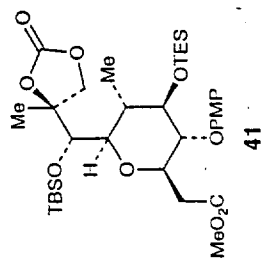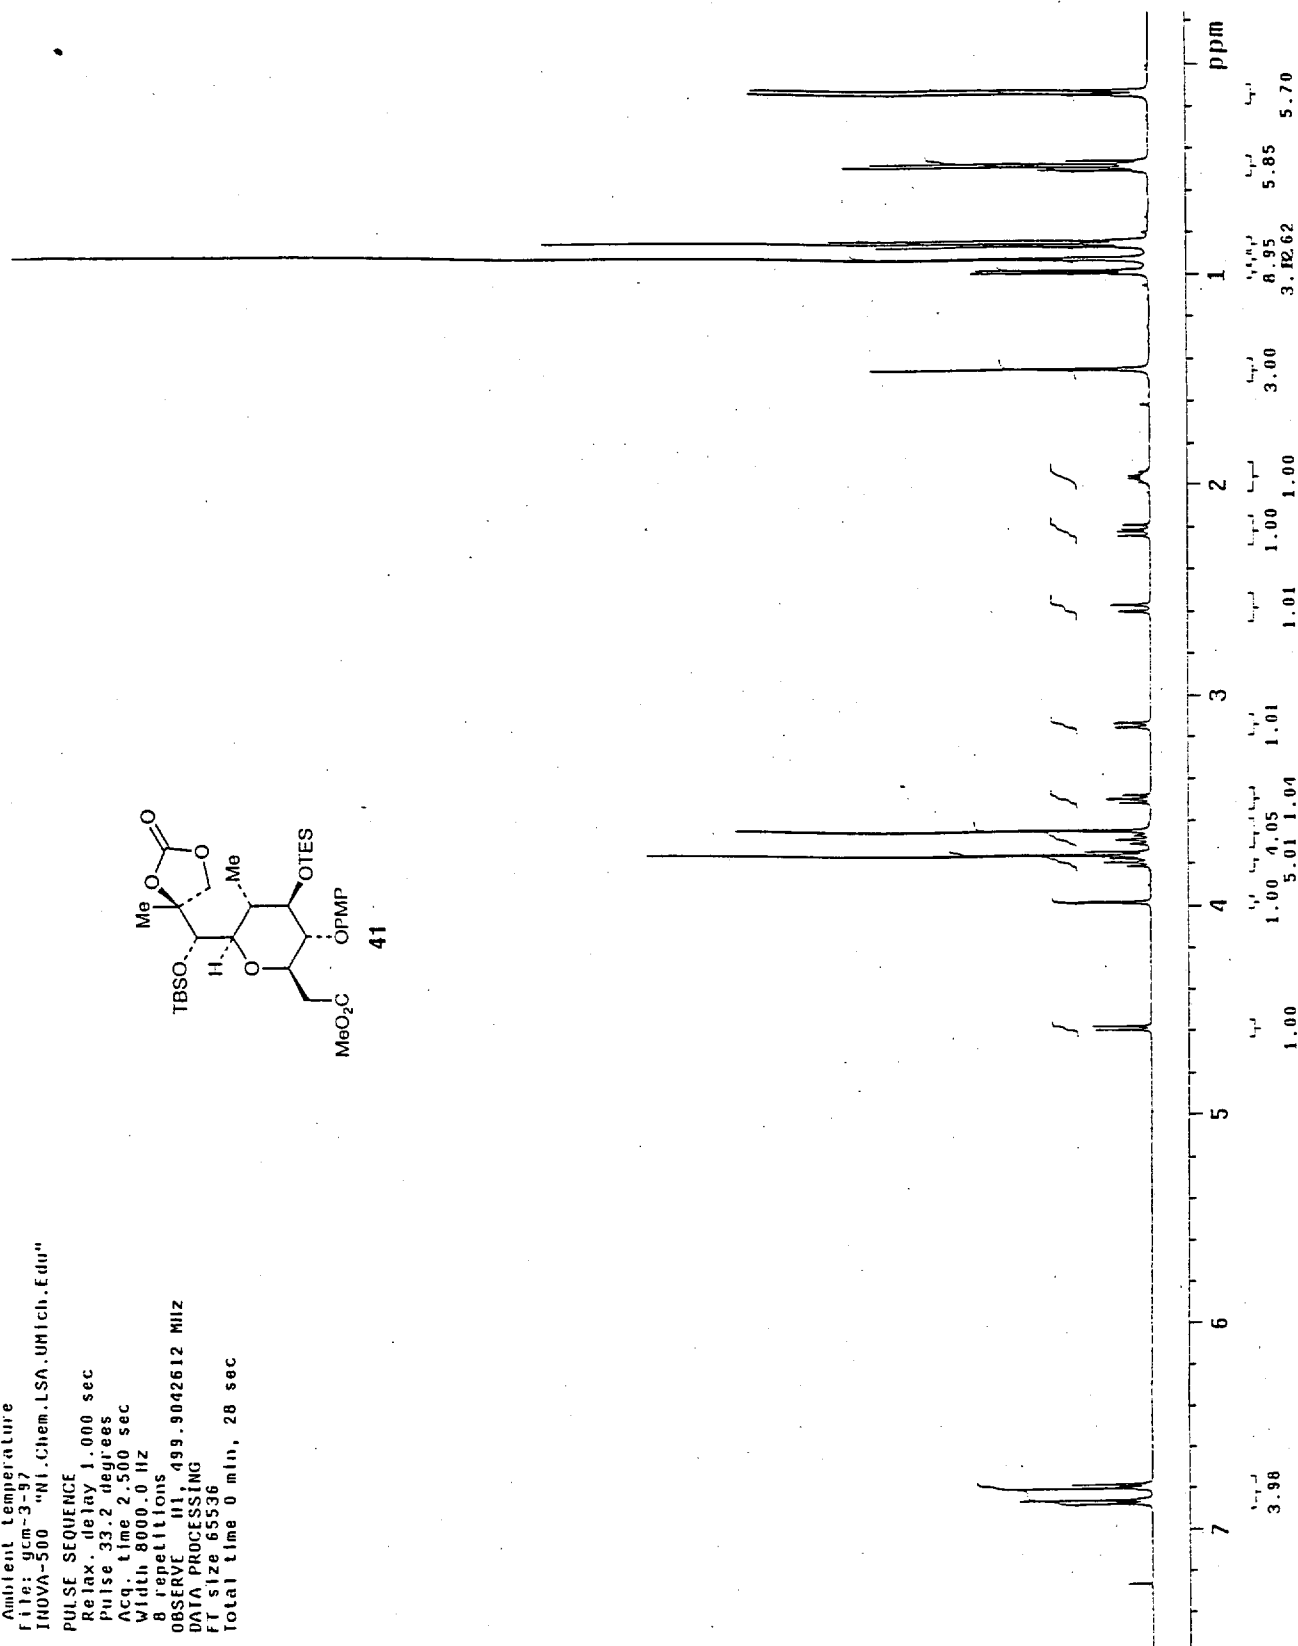

S39

pyran 42

Pulse Sequence: s2pul  
 Solvent: CHCl<sub>3</sub>  
 Ambient Temperature  
 File: gcm-2-248  
 INOVA-500 "N1.Chem.LSA.UMich.Edu"  
 PULSE SEQUENCE  
 Relax delay 1.000 sec  
 Pulse 39.0 degrees  
 Acq. time 2.500 sec  
 Width 8000.0 Hz  
 8 repetitions  
 OBSERVE H1, 499.9042617 MHz  
 DATA PROCESSING  
 FT size 65536  
 Total time 0 min, 28 sec

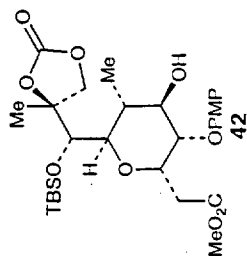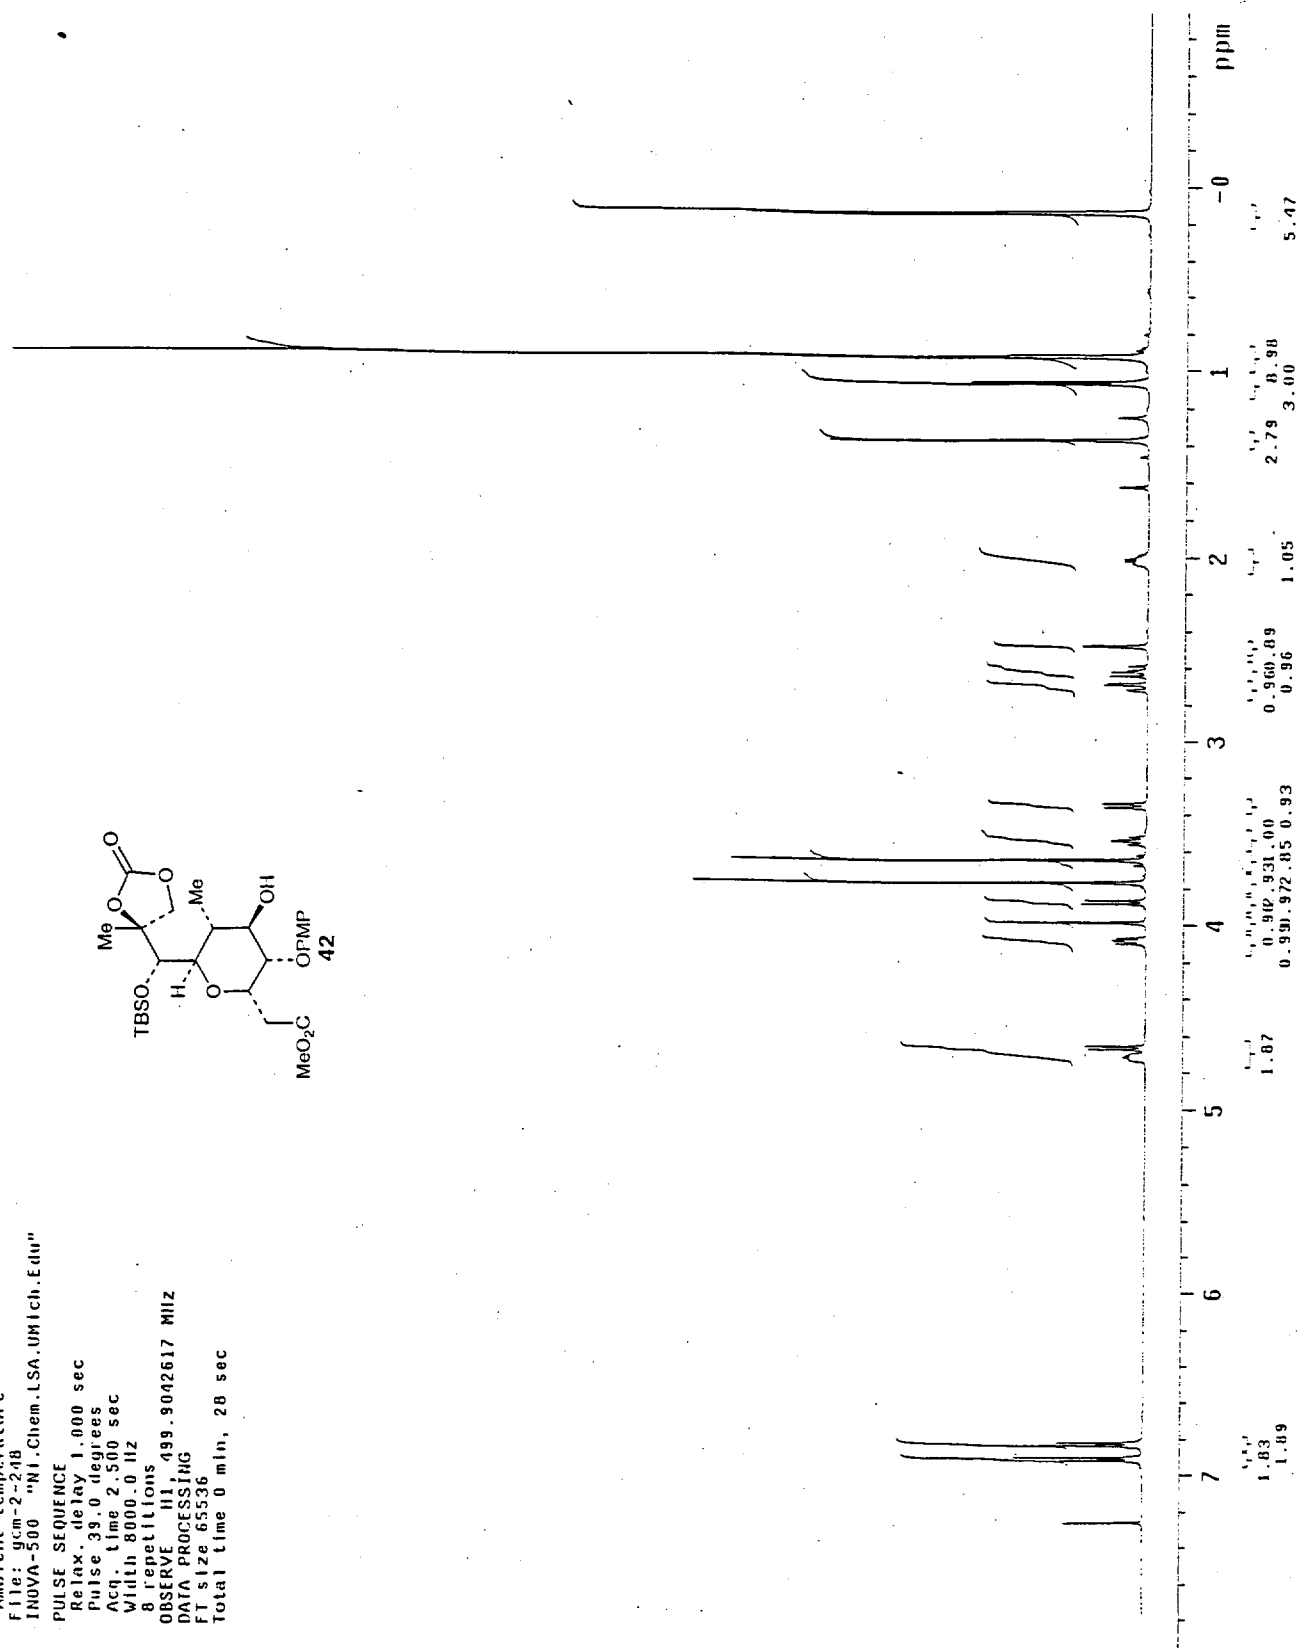

S40

pyran 43  
 Pulse Sequence: s2pul  
 Solvent: CDCl3  
 Ambient Temperature  
 File: gcm-3-28  
 INOVA-500 "N1.Chem.LSA.UMich.Edu"  
 PULSE SEQUENCE  
 Relax. delay 1.000 sec  
 Pulse 40.0 degrees  
 Acq. time 2.500 sec  
 Width 8000.0 Hz  
 8 repetitions  
 OBSERVE III 499.9042612 MHz  
 DATA PROCESSING  
 FI size 65536  
 Total time 0 min, 28 sec

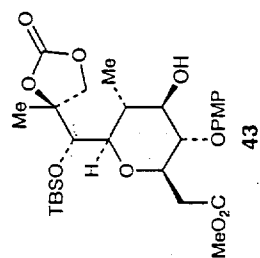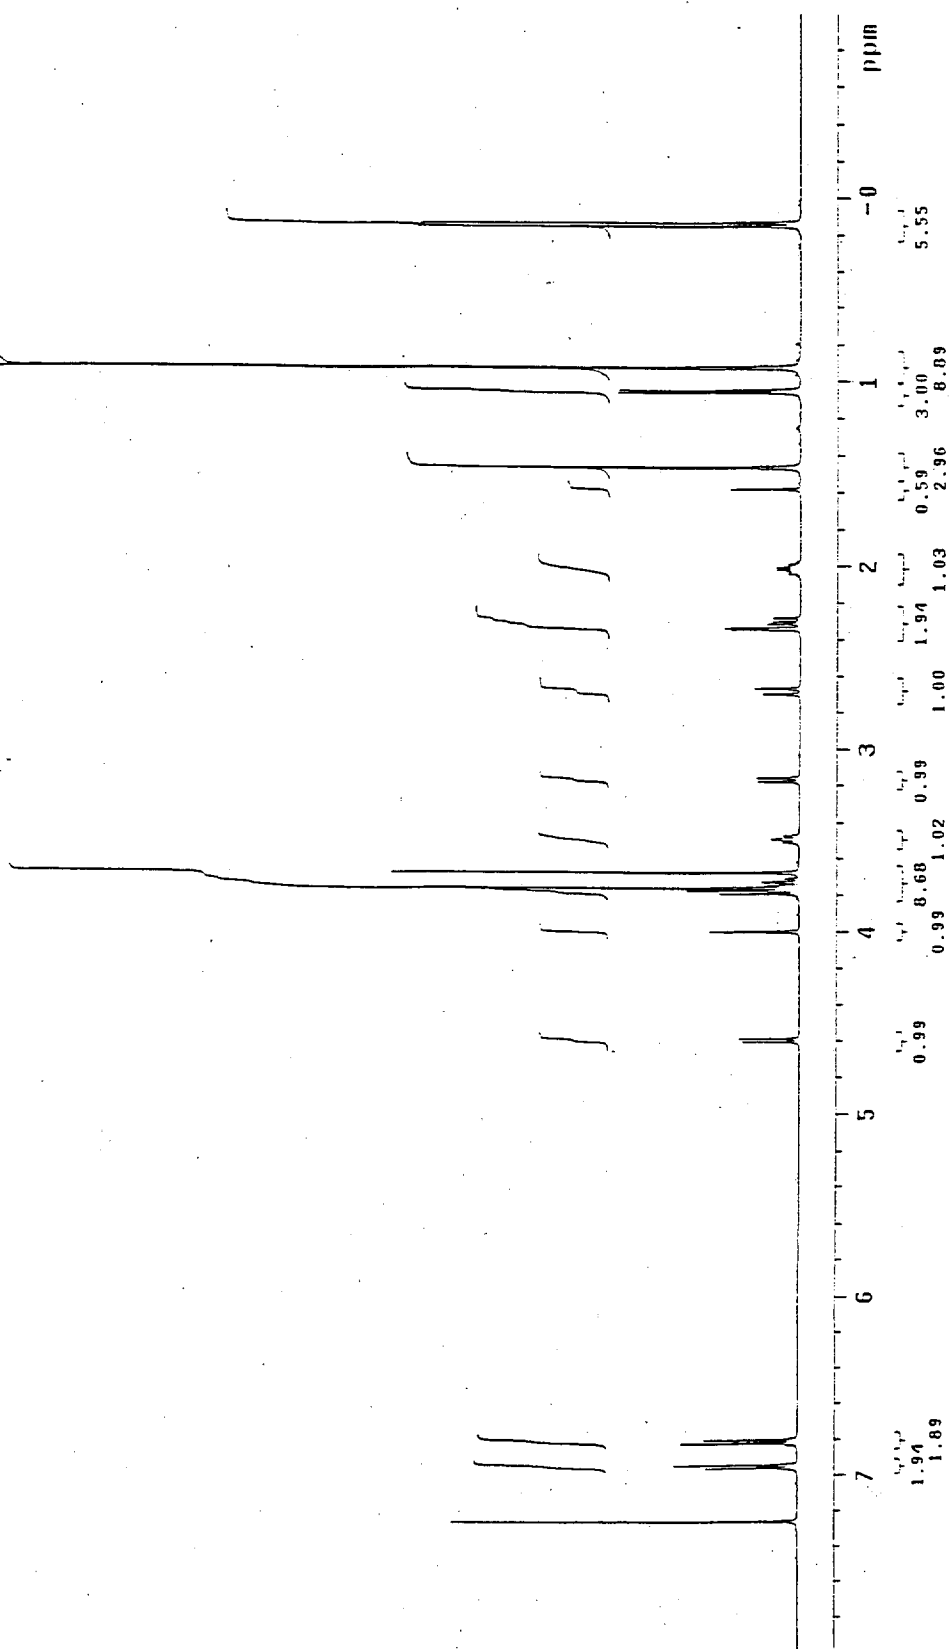

Supplement: Supplementary file 1 [file 5777337]
